# Supplementary material
Source: HighWire-hosted journal article supplement (https://openres.ersjournals.com/content/7/2/00917-2020)
Supplement: inline-supplementary-material-3 [file inline-supplementary-material-3.xlsx]

## Sheet: Worksheet1
Gene	diffexpScore.0	pvalue.0	qvalue.0	fluctuation.0
CST1	277.3	0.383667	0	0	0.00049253	0.00193136	0.00129625	0.00384269	0.00118139	0.000337088	0.000777979	0.00245192	0.000644763	0.786915	0.00185447	0.00404342	0.00265999	0.00364644	0.000377731	0.0018877	0.00229904		0.114939	0.471707	0.00222215	0.0402814	0.00632196	0.126264	0.0326421	0.168143	0.000610854	2.34948	0.000213881	0.0811254	0.062465	1.11298	0.00887395	0.000463945	0.369655	0.0363878	0.133766	0.0219603	0.472512	0.162773	0.835349	0.539669	0.929984	0.00625138	0.169406
CCL26	268.25	0.383667	0	0	0.000601981	0.000148566	0.000297056	0.000380807	0.0002017	0.000337088	0	0.000459735	0.00061673	0.00479023	0.00091152	8.79005e-05	0.000278371	0.000991832	0.0004649	0.000446183	0		0.00177183	0.00690558	0.000349195	0.00316623	0.00115999	0.0156496	0.000837872	0.00512146	0.000868056	0.0226803	0.000463409	0.00343884	0.00144581	0.043811	0.00110924	0.000596501	0.00379783	0.00153176	0.000567859	0.00415379	0.00187324	0.00255517	0.00394759	0.0109576	0.00544168	0.000252581	0.00804374
FOXQ1	220.5	0.866643	0	4.20059e-10	5.47256e-05	0	2.70051e-05	6.92377e-05	0.000172886	5.61814e-05	7.40933e-05	0	0	0	3.14317e-05	8.79005e-05	3.09301e-05	0	0	0	0.000125402		0.00019687	0	0.000222215	0.000492524	0.000202999	0.000112385	6.98227e-05	0.000657485	0.000289352	0	0.000641643	0.000508011	0.000177038	0.000119593	0.000504202	0.000430806	9.49457e-05	3.40391e-05	0.000141965	6.43998e-05	0.000368972	0.000308867	0.000111988	5.54816e-05	3.62779e-05	0.000315726	6.96427e-05
ZG16	-21.25	0.999709	0	0.0370877	0.000218902	0.000207993	0	3.46188e-05	0.000172886	8.4272e-05	3.70466e-05	0.000344801	0	3.21492e-05	0.000125727	0.000307652	3.09301e-05	0	0.000610181	3.43218e-05	0		0	0	0.000158725	0	0.000405997	2.80962e-05	0	0.000138418	0.000257202	0.00054162	0.000142587	0	0	0.000159458	3.36134e-05	6.62778e-05	0	0.000102117	0	0	0	0.000112315	0.000111988	0	0.000326501	0	0.000313392
MTRNR2L6	-0.15	0.999709	0	0.309	2.73628e-05	8.91398e-05	0.000162031	6.92377e-05	2.88143e-05	2.80907e-05	0	0.000268179	5.60664e-05	0	0.000345749	0.000439502	0	2.91715e-05	2.90563e-05	0	4.18008e-05		3.28116e-05	3.27279e-05	9.52351e-05	0	0.000173999	0.000196673	0	0.000173022	0	6.77025e-05	0.00010694	0	5.90127e-05	7.97289e-05	0	3.31389e-05	6.32971e-05	0.000136156	0	0.000160999	0.00011353	0	2.79971e-05	0	0	0.000221008	0.00024375
ZNF398	-47.05	0.999709	0	0.187718	8.20883e-05	2.97133e-05	0.000297056	0.000692377	0	0	0.00066684	3.83112e-05	8.40996e-05	6.42983e-05	0.000345749	0.000263701	0.000340231	0.000350058	2.90563e-05	0.000411862	8.36016e-05		0.000328116	9.81836e-05	0	0.000175901	2.89998e-05	0	0.000209468	0.000173022	0.000353652	0	0.000249528	0.000468933	0.000118025	0	0.000369748	3.31389e-05	0.000379783	0.000136156	0.000212947	0	0.000170295	2.80788e-05	0.000167983	8.32224e-05	0	0.000157863	0.000139285
XKRX	-13.2	0.999709	0	0.100467	0	0.000683405	2.70051e-05	3.46188e-05	0	0	0.00033342	0.00030649	2.80332e-05	3.21492e-05	6.28634e-05	0	0.000340231	0.00037923	8.71688e-05	0	0.000209004		0	0.000261823	0	7.03606e-05	2.89998e-05	0	0.000139645	0	0.000417953	0	0.000249528	0	2.95064e-05	0	6.72269e-05	9.94168e-05	0.000189891	3.40391e-05	0	0	2.83825e-05	5.61577e-05	0	0.000110963	0.000217667	0.000378872	0.000174107
IFT122	-4.4	0.999709	0	0.00592313	0.000136814	0.000713118	0.000135026	0.000138475	0.000662729	8.4272e-05	0.00011114	3.83112e-05	0.000224266	0.000128597	0.00106868	0.000131851	0.000618601	0.000262544	0	0.000823723	0.000376207		0	0.000196367	0.00038094	0.000105541	0.000173999	0.000112385	6.98227e-05	0.000380649	0.000257202	0	0.000249528	0.000586166	5.90127e-05	7.97289e-05	0.000336134	0.000331389	0.000189891	0.000102117	0.000106474	0.000160999	0.000283825	0.000280788	0.000167983	0.000388371	0.000798114	0.000252581	0.000557142
DEFB1	220.75	0.866643	0	0	0.00853719	0.0112316	0.0057791	0.0135014	0.00994093	0.00797775	0.00366762	0.00628304	0.00804553	0.0142421	0.00688355	0.013273	0.00244348	0.0088098	0.0600883	0.00494234	0.0103248		0.00538111	0.0127311	0.017682	0.0138962	0.0194299	0.0255114	0.00659824	0.0122846	0.0402521	0.034596	0.0158985	0.0216491	0.00610782	0.0153877	0.0104538	0.0241251	0.0101275	0.0145347	0.012138	0.00937017	0.0112395	0.0208064	0.00506747	0.0143697	0.0405224	0.00741957	0.0353785
KCNK7	-19.4	0.999709	0	0.256997	2.73628e-05	0.000207993	5.40103e-05	0	2.88143e-05	5.61814e-05	0.00011114	3.83112e-05	0.000308365	0.000289343	0.000377181	4.39502e-05	0	0	0.000348675	0.000205931	0.000167203		0.000164058	9.81836e-05	0.000158725	0.000140721	0.000144999	0	0	0	0.000289352	3.38513e-05	0	0.0003517	0	0.000199322	0	9.94168e-05	9.49457e-05	0.000340391	0	0	0	0.000308867	0	0	0.000544168	6.31453e-05	3.48214e-05
FAM160A2	-1.5	0.999709	0	0.00481153	0	0.000148566	0.000108021	0.000380807	0.000432214	0.000196635	0.00011114	3.83112e-05	5.60664e-05	0	6.28634e-05	0	0.00111348	2.91715e-05	0.000377731	6.86436e-05	0		0.000164058	9.81836e-05	3.1745e-05	0.000386983	0.000115999	0.00022477	0	6.92089e-05	0.000225051	0.000101554	0.000142587	3.90778e-05	0.000118025	0.000119593	0.000605042	9.94168e-05	0.000158243	0.000238274	3.54912e-05	0	0.000141912	0.000280788	0	2.77408e-05	0.000108834	0	6.96427e-05
C17orf67	-3.5	0.999709	0	0.874483	0.000136814	0	0.000216041	0.00031157	0.000115257	0	3.70466e-05	0	2.80332e-05	0	0.000282885	0	9.27902e-05	0	8.71688e-05	3.43218e-05	0		0	0	6.349e-05	0.000140721	2.89998e-05	5.61924e-05	0	0	6.43004e-05	0	0.000285174	7.81555e-05	8.85191e-05	0.000199322	0	0.000231972	3.16486e-05	0	0	0.0001288	0.000170295	0.000112315	0	2.77408e-05	7.25558e-05	0.000157863	0
GJB2	-15.4	0.999709	0	0.733859	0.000136814	2.97133e-05	0.000135026	0.000207713	0	0	0.000296373	0.000229867	2.80332e-05	3.21492e-05	0.000251454	0.000131851	0.00012372	0	0	3.43218e-05	0		0.00019687	0.000130911	0	0.000140721	2.89998e-05	5.61924e-05	3.49113e-05	0.000103813	0.000225051	0.000169256	7.12936e-05	7.81555e-05	8.85191e-05	0.000119593	0	3.31389e-05	0.00022154	0	3.54912e-05	9.65997e-05	0	2.80788e-05	0.000111988	0.000471593	0.000290223	0.000126291	0
HSPA4L	-31.3	0.999709	0	0.789931	0.000355716	5.94265e-05	2.70051e-05	6.92377e-05	0.000144071	0	0	0.000191556	5.60664e-05	0.000160746	0.000282885	4.39502e-05	0	0	0.000203394	0.000274574	0.000292605		0.000131247	0	0.00012698	0.000140721	0.000202999	0.000112385	0	0	0.000128601	0	0	0.000195389	8.85191e-05	0.000119593	0	0	0.000253189	0	0	0.000386399	0.00011353	0.000196552	0.000111988	0.000221926	0.000217667	0.000252581	0.000104464
SMG8	-2.9	0.999709	0	0.901475	8.20883e-05	0.000118853	0	6.92377e-05	0.0002017	2.80907e-05	0.00011114	0	2.80332e-05	0	0.00018859	0.000175801	3.09301e-05	0.000116686	0	3.43218e-05	0		0	3.27279e-05	0.000222215	0	0	8.42886e-05	0	6.92089e-05	0.000225051	6.77025e-05	0	3.90778e-05	0	0	0.000134454	0	0.000189891	0	3.54912e-05	0	0.000198677	0.000140394	0	5.54816e-05	0.000108834	0.000126291	0
CPNE8	-5.1	0.999709	0	0.0236988	0.000136814	0.000356559	0.000162031	0.000484664	0.000547472	0.000168544	0.000148187	0.000114934	0.000140166	9.64475e-05	9.42951e-05	0.000131851	0.000556741	0	0.000726406	0.000240253	0.00117042		0.000328116	3.27279e-05	0.0006349	0.000105541	8.69994e-05	0.000112385	0.000139645	0.00031144	0.000835905	0	0.000463409	7.81555e-05	0.000206545	0	0.000302521	0.00029825	0.000158243	0.000204234	0.000177456	0.000354199	0.00034059	0.000112315	5.59942e-05	0.000110963	0.000616724	0.000315726	0.000870534
TRPV2	-20.1	0.999709	0	0.00021808	0.000218902	0.00017828	0	0.000173094	0.000432214	0	3.70466e-05	0	0.000112133	0	0.00018859	0	3.09301e-05	0.000204201	0.000406788	3.43218e-05	0		0	0	0.000158725	0.000211082	0.000173999	0.00022477	0	3.46045e-05	0.000192901	0.000101554	0.00010694	0	0	0.000279051	0.000168067	0	0	0	0	3.21999e-05	0	5.61577e-05	5.59942e-05	0.000166445	0.000580446	3.15726e-05	0.000174107
TMEM222	-25.75	0.999709	0	0.81279	5.47256e-05	0.000386272	8.10154e-05	0	8.64429e-05	0.000168544	0	3.83112e-05	0.000280332	3.21492e-05	0.000125727	0.000351602	3.09301e-05	0.000145858	8.71688e-05	0.000102965	0.000376207		0	0.000130911	0.00025396	0	0	8.42886e-05	0.000174557	3.46045e-05	0	0	0.000142587	0.000195389	0	0	0.00010084	0.000132556	3.16486e-05	0.00037443	0.000106474	0.000193199	0.000170295	0.000168473	0	5.54816e-05	0	0.000126291	0.00024375
KCNN4	-17.65	0.999709	0	0.0353724	0.000410442	0.000326846	0.000324062	0.000242332	5.76286e-05	0.000393269	3.70466e-05	0	0.000252299	6.42983e-05	3.14317e-05	0.000219751	9.27902e-05	8.75146e-05	8.71688e-05	0.000102965	0		9.84349e-05	0	0.000285705	0.000351803	0.000463997	0.000168577	0	0.000138418	0.000771605	0.000169256	0	0.000234467	0	0.000279051	0.000235294	0.000463945	9.49457e-05	0.00037443	0	0.000225399	0	2.80788e-05	5.59942e-05	0	0	0.000126291	0.000104464
VPS52	-10.8	0.999709	0	0.000818316	0.000191539	0.000742832	0.000297056	0.00138475	0.000316957	0.000196635	0.000148187	0.000344801	0.000981162	0.00125382	0.000502907	0.000219751	0.00170115	0.000904317	5.81125e-05	0.00116694	0.000334406		6.56233e-05	0.000621829	0.00050792	0.000211082	0.000318998	0.000280962	0.000104734	0.000657485	0.000289352	0.000473918	0.000962464	0.000859711	0.000236051	0.000119593	0.000638655	0.000231972	0.000411431	0.000544625	0.000425894	0.000804997	0.00022706	0.00137586	8.39913e-05	0.000416112	0.001306	0.000820888	0.00121875
HBB	-29.85	0.999709	0	0	5.47256e-05	0.000623979	0.000189036	0.00190404	0.000115257	0.00129217	3.70466e-05	0.00126427	5.60664e-05	0.00253978	0.000125727	0.000219751	0.000587671	0.000320887	0.127063	0	0.000209004		0.000295305	0	0.00238088	0.000457344	0.17716	0.00974938	0.000453847	0.000415254	0.000996656	0.000101554	0	0	8.85191e-05	0	0	0.00218717	0.00395607	0.000238274	0	0.0001288	8.51474e-05	0.000112315	0.000335965	0.000110963	0	0	0
DUSP6	-29.7	0.999709	0	0.00987325	0.000519893	0.000267419	0.000486092	0.000103857	0.000720357	0.000308997	0.000296373	0.000191556	0.000224266	0.000289343	0.00106868	0.000263701	0.00108255	0.000875146	0.000958856	0.000583471	0.000167203		3.28116e-05	0.000196367	0.00012698	0.000457344	0.000782995	0.000955271	6.98227e-05	0.000242231	0.00102881	0.000406215	0.000463409	0.000898789	0	0.000119593	0.000605042	0.000397667	0.000189891	0.000102117	0.00028393	0	0.000624415	0.000393104	0.000251974	0.000249667	0.000580446	0.000221008	0.00052232
DOPEY1	-5.25	0.999709	0	0.624621	0.000246265	0	5.40103e-05	0.000207713	5.76286e-05	8.4272e-05	7.40933e-05	0.000344801	0	0	0.000157159	0	3.09301e-05	0.000350058	0.000116225	0.000446183	0.000292605		9.84349e-05	0	0	3.51803e-05	0.000115999	0.000140481	0.000139645	0	0.000353652	0.000135405	0.000178234	0.000156311	0.000118025	0.000119593	6.72269e-05	0.000430806	0.000189891	0.000306352	0	3.21999e-05	0.000141912	0.000308867	2.79971e-05	0.000221926	0.000145112	0.000284154	3.48214e-05
PLEKHA7	-4	0.999709	0	0.340696	0	8.91398e-05	0.000378072	0	0.000518657	0.000224725	0.000148187	0.000229867	5.60664e-05	6.42983e-05	0.000345749	0	6.18601e-05	5.83431e-05	0.000203394	0	4.18008e-05		0.000131247	0.000130911	0	0.000316623	0.000115999	0.000393347	0	0.000173022	0.000257202	0.000372364	3.56468e-05	0	0	3.98645e-05	0.00010084	9.94168e-05	0	0.000306352	0.000177456	9.65997e-05	5.6765e-05	0.000196552	0.00019598	8.32224e-05	7.25558e-05	0.000252581	6.96427e-05
AADAT	-38.35	0.999709	0	0.183172	0.000328353	0.000148566	0.000162031	0.000103857	0.000288143	0.000112363	0	0	0.000336398	6.42983e-05	0.000502907	0.000351602	0.000587671	0.000408401	8.71688e-05	0.000514827	0.000125402		0.000229681	0.000261823	3.1745e-05	3.51803e-05	8.69994e-05	0	3.49113e-05	0.000173022	0.000257202	0.000101554	3.56468e-05	0.000273544	2.95064e-05	0.000239187	0.000235294	0.000265111	0.000284837	0.000578664	0.000177456	0.000482998	0.000425737	0.000393104	0	0.000305149	0.000326501	0.000157863	0.000139285
UNC79	-3.85	0.999709	0	0.0843993	0	0.00017828	0.000162031	0	2.88143e-05	0	0	0	0	9.64475e-05	0.000125727	0.000263701	3.09301e-05	0.000204201	0	0.000171609	0		3.28116e-05	6.54557e-05	0	0	0	5.61924e-05	0	0	6.43004e-05	3.38513e-05	0	0.000195389	0.000118025	0	0	0	6.32971e-05	0	0.000319421	0	0.000482502	0.000393104	0	0.000110963	0.000145112	9.47179e-05	0.000417856
CLN6	-1.5	0.999709	0	0.22398	0.000519893	0.000118853	5.40103e-05	0.000103857	0.000374586	0	7.40933e-05	0.000114934	5.60664e-05	0	0.00018859	0	6.18601e-05	0.000495916	0.000261506	0	0		3.28116e-05	0.000261823	0	0.000140721	2.89998e-05	0.000112385	0.000104734	0.000103813	0.000450103	0.000406215	0.000249528	0.000117233	2.95064e-05	0	0.000403361	0.000231972	0.000126594	0	0	0.0001288	0.00011353	8.42365e-05	0	0.000110963	0	0	3.48214e-05
AKR7A2	-5.85	0.999709	0	0.999995	0.000136814	2.97133e-05	0.000216041	3.46188e-05	0.000230514	0	0.000370466	0.000268179	5.60664e-05	0	0.000282885	0.000351602	0.00015465	0	5.81125e-05	3.43218e-05	4.18008e-05		0.000262493	6.54557e-05	0.000285705	0.000140721	0.000173999	0.000168577	0.000209468	0.00031144	0.000385802	3.38513e-05	0.000285174	0.000468933	8.85191e-05	0.000318916	0	0.000430806	0.000253189	0.000136156	0.000212947	0.0001288	0.000255442	0.000336946	0.000111988	0.000110963	0.000145112	0	3.48214e-05
IP6K3	-13.25	0.999709	0	6.45058e-31	0.000574618	0.000921111	0.000432082	0.00308108	0.00132546	0.000365179	0.000592746	0.000344801	0.000560664	0.000675133	0.00276599	0.00127456	0.0053509	0.00037923	2.90563e-05	0.00281439	0.000585211		0.000820291	0.000327279	0.00117457	0.000422164	0.000898994	0.000168577	0.000663315	0.000657485	0.000900206	0.000169256	0.000213881	0.00160219	0.000619634	0.00171417	0.00221849	0.000828473	0.00183562	0.00282524	0.00134867	0.0014168	0.00105015	0.00148818	8.39913e-05	0.000416112	0.000362779	0.000915606	0.00306428
USO1	-9.7	0.999709	0	0.0847052	0.000465167	0.000475412	0.000405077	0.000346188	0.000345772	0.00101126	0.000296373	0.00091947	0.000840996	0.000417939	0.000628634	0.00131851	0.00139185	0.000408401	0.00023245	0.00120126	0.00108682		0.000492174	0.000654557	0.000698391	0.000457344	0.000260998	0.000252866	0.000488759	0.000899716	0.00141461	0.000981686	0.0010694	0.000508011	0.000383583	7.97289e-05	0.000705882	0.000762195	0.000759566	0.000170195	0.000248438	0.000643998	0.000312207	0.00109507	0.000363962	0.000416112	0.00068928	0.000505162	0.000800891
SPRR2F	-28.9	0.999709	0	2.04754e-62	0.000656707	0.000267419	0.00199838	0.00114242	0.000259329	0	0.00011114	0.000153245	0.000925095	0.000160746	0	0.000131851	6.18601e-05	0.00096266	0.00255695	0	8.36016e-05		0	0.000261823	0.000349195	0.000351803	0.000840994	0.0021915	3.49113e-05	0	0.00331147	0.000236959	0.000249528	0.000586166	0.000442595	0.000199322	0.000134454	0	0	0.000170195	3.54912e-05	0.000225399	0.000510885	0	0.000335965	0.00127608	0.00050789	0.000221008	6.96427e-05
SH3GLB2	-3.7	0.999709	0	0.0815551	0.000136814	0.000207993	0.000189036	6.92377e-05	0.000172886	0.000112363	0.000370466	0.000344801	0.000308365	0	6.28634e-05	0.000922955	0.00102069	0.000204201	0.000493956	0.000274574	0.000501609		6.56233e-05	9.81836e-05	3.1745e-05	0.000598065	0.000318998	0	0	0.000207627	6.43004e-05	0.000372364	7.12936e-05	0.000508011	0.000678646	0.000438509	0.000369748	0.000198834	0.000411431	0.000408469	0.00028393	0.000515198	0.000510885	0.000140394	8.39913e-05	0.000221926	0.000362779	0.000347299	0.00052232
AQP11	-5.05	0.999709	0	0.867697	0.000246265	2.97133e-05	0	6.92377e-05	0.000144071	0.000224725	0.000296373	0.000191556	5.60664e-05	9.64475e-05	0.000377181	4.39502e-05	0.000463951	2.91715e-05	5.81125e-05	0.000137287	4.18008e-05		0.000131247	0.000229095	0.00012698	3.51803e-05	8.69994e-05	2.80962e-05	0.000174557	0	0.000128601	0	0.000213881	7.81555e-05	0.000147532	0.000199322	0.000235294	6.62778e-05	0.000348134	0.000204234	0.000177456	0	0.000198677	0.000393104	0	2.77408e-05	7.25558e-05	0.000315726	0.000104464
VWA2	-4.45	0.999709	0	0.319668	5.47256e-05	0.000267419	0.000189036	0	0.000259329	0.000477542	0	0	8.40996e-05	9.64475e-05	0.000565771	8.79005e-05	0.000433021	0.00037923	2.90563e-05	0.000102965	0		0.000131247	3.27279e-05	0.00019047	3.51803e-05	0	2.80962e-05	3.49113e-05	6.92089e-05	0.000225051	0.000203108	0	0.000117233	0.000147532	0.000239187	0.00010084	0.000198834	0.000284837	0.000408469	3.54912e-05	0.0001288	0	0.000196552	0	8.32224e-05	0.000145112	0.000221008	0.00024375
NUDT17	-26.6	0.999709	0	0.435865	0.000109451	0.000564552	0.000135026	0.000173094	0.000259329	0.000112363	7.40933e-05	0.000114934	0.000364431	0	9.42951e-05	0.000659254	3.09301e-05	0.00037923	8.71688e-05	0.000583471	0.000292605		9.84349e-05	0.000196367	0.00012698	0	8.69994e-05	5.61924e-05	0.000279291	0	0.000257202	3.38513e-05	0.000249528	0.000156311	0.000177038	7.97289e-05	0.000369748	0.000231972	0.000348134	0	0	0	0.000141912	0.000308867	0.000251974	5.54816e-05	0.000181389	0.000536735	0.00024375
WWP2	-0.05	0.999709	0	9.18978e-22	0.000519893	0.00136681	0.000972185	0.00276951	0.00253566	0.00103936	0.000518653	0.000651291	0.00061673	0.000450088	0.000628634	0.000527403	0.0047323	0.00128355	0.000726406	0.00147584	0.000627012		0.000262493	0.000850925	0.00050792	0.000422164	0.000753995	0.000983367	0.000488759	0.00114195	0.00135031	0.000236959	0.00010694	0.00183665	0.00132779	0.00207295	0.00228571	0.000729056	0.000569674	0.00204234	0.00173907	0.000933797	0.000539267	0.00409951	0.00019598	0.000443853	0.00152367	0.000315726	0.00118393
HBEGF	-3.6	0.999709	0	8.77724e-06	8.20883e-05	8.91398e-05	8.10154e-05	0	0.0002017	0	3.70466e-05	0.000229867	0.000196232	0.000192895	3.14317e-05	0.000219751	0	8.75146e-05	0.000726406	0.000274574	4.18008e-05		0	0.000490918	0	0	0.000202999	0.000505732	0.000104734	0.000173022	0.000675154	0.000304661	3.56468e-05	0	0.000118025	0	0	0.000132556	3.16486e-05	0	0.000141965	0	0.000141912	0.000140394	0.000111988	0.000138704	3.62779e-05	3.15726e-05	3.48214e-05
ARFGEF1	-6.5	0.999709	0	0.516852	0.000410442	0.000118853	0.000243046	0.000173094	0.000259329	0.000337088	0.00011114	0.000498046	2.80332e-05	0.000289343	0.000565771	0.000131851	0.000278371	0.000145858	0.000145281	6.86436e-05	0		0.000557798	0	0	0.000386983	8.69994e-05	0.000393347	0.000104734	0.000242231	0.000643004	0.000338513	0.000499055	0.000234467	0.000295064	7.97289e-05	0.000268908	0.000530223	0.000379783	0.000136156	0.000390403	0.000257599	0.000425737	0.000308867	0.000111988	0	0.000290223	0.000252581	0.00024375
NFKBIZ	-19.85	0.999709	0	0.479531	0.000218902	0	0.000189036	0.000138475	0.000576286	0	0	0.000114934	0.000252299	0	0	0	9.27902e-05	2.91715e-05	0.000174338	0	0		0.000131247	0	0.000158725	0	0.000144999	0.000309058	0	0	0.000321502	6.77025e-05	0.000142587	3.90778e-05	0	0	0.00010084	0.000198834	3.16486e-05	0	0	0.000257599	0.000170295	0.000196552	0.000111988	0.000166445	0	3.15726e-05	0
CEP104	-13.9	0.999709	0	0.601067	2.73628e-05	0.000118853	0	0.000173094	0	0	0.00033342	3.83112e-05	5.60664e-05	0.000225044	0.000314317	0	0.000247441	0	0	6.86436e-05	4.18008e-05		0	0	0	0	0	0.000112385	0	0	0.000192901	0	0.00010694	0.000234467	0.000206545	0	3.36134e-05	0.000265111	0	0.000272313	0.000141965	3.21999e-05	8.51474e-05	8.42365e-05	5.59942e-05	5.54816e-05	0.000108834	9.47179e-05	0
FCGR1B	-37.7	0.999709	0	1.43368e-37	0.000300991	2.97133e-05	2.70051e-05	0.000276951	0.000864429	0	0	7.66225e-05	0.000308365	0	0	0	0.00018558	0.000116686	0.00142376	0	4.18008e-05		0	6.54557e-05	6.349e-05	0.000140721	0.000144999	0.000505732	0	6.92089e-05	0.000417953	0.000135405	0.000427762	3.90778e-05	5.90127e-05	3.98645e-05	6.72269e-05	3.31389e-05	0	0.000136156	7.09824e-05	0	0	8.42365e-05	5.59942e-05	2.77408e-05	0.000253945	0	0
SFI1	-18.1	0.999709	0	0.348992	0.000109451	2.97133e-05	0.000108021	3.46188e-05	0	5.61814e-05	7.40933e-05	7.66225e-05	2.80332e-05	3.21492e-05	0.000628634	8.79005e-05	0.000371161	0.000262544	5.81125e-05	0.000171609	0.000334406		0	6.54557e-05	0.000349195	3.51803e-05	0	0.000168577	0	0.000207627	3.21502e-05	3.38513e-05	0.000213881	7.81555e-05	0	0.000478374	6.72269e-05	0.000132556	0.00022154	0.000102117	3.54912e-05	6.43998e-05	0.000198677	0.000280788	2.79971e-05	0.000110963	3.62779e-05	0.000189436	0.00024375
CENPH	-14.35	0.999709	0	0.12842	0.000191539	0.000415986	0.000108021	0.000830852	0.000345772	8.4272e-05	0.000185233	3.83112e-05	0.000364431	0	3.14317e-05	4.39502e-05	3.09301e-05	0.000204201	5.81125e-05	3.43218e-05	4.18008e-05		0	0.000130911	0.00038094	3.51803e-05	0	2.80962e-05	6.98227e-05	0.000449858	0.000257202	0	0.000320821	0.000273544	8.85191e-05	7.97289e-05	0.000336134	0.000265111	6.32971e-05	0.000170195	3.54912e-05	3.21999e-05	0.000141912	0.000505419	0.000111988	0.000110963	0	0.000347299	0
DARS2	-17.6	0.999709	0	0.807992	0.000273628	0.000267419	5.40103e-05	6.92377e-05	8.64429e-05	2.80907e-05	0	0.00030649	8.40996e-05	6.42983e-05	6.28634e-05	0.000131851	0.000309301	2.91715e-05	0	0.000274574	0.000167203		0	0.000130911	9.52351e-05	0.000351803	0	0.000140481	3.49113e-05	0.000207627	0	0	7.12936e-05	7.81555e-05	0.000206545	0.000119593	0.000302521	9.94168e-05	0	0.000170195	0	0	5.6765e-05	0.000280788	0	0.000110963	0.000217667	0.000347299	0.000383035
CD247	-33	0.999709	0	0.37921	2.73628e-05	0.000118853	2.70051e-05	0	0.000230514	0	7.40933e-05	0.000153245	0.000224266	0	6.28634e-05	0.000263701	3.09301e-05	2.91715e-05	2.90563e-05	3.43218e-05	0		6.56233e-05	0	6.349e-05	0	0	5.61924e-05	0	0	0.000289352	0	0.000178234	0.000234467	0.000177038	0	0.000235294	9.94168e-05	0.000126594	6.80782e-05	0.000212947	9.65997e-05	5.6765e-05	8.42365e-05	0	2.77408e-05	0.000253945	0.000126291	0
WDR19	-0.4	0.999709	0	0.319131	2.73628e-05	0	0.000297056	0	2.88143e-05	8.4272e-05	0.000185233	7.66225e-05	2.80332e-05	9.64475e-05	6.28634e-05	0	3.09301e-05	2.91715e-05	2.90563e-05	0.000171609	4.18008e-05		0	0.000163639	0	0.000281442	0	0	0.000139645	0	3.21502e-05	0	0	0.000547089	2.95064e-05	7.97289e-05	0.000134454	0.000132556	0.000126594	0.000136156	0	0.000225399	0.00022706	0.000224631	0	5.54816e-05	0.000217667	0	6.96427e-05
SLC48A1	-7	0.999709	0	0.158832	0.000738795	0.000297133	0.000486092	0.000969328	0.000518657	0.000280907	0.000185233	0.00030649	0.000280332	0.000289343	0.000565771	0.000351602	0.000618601	0.000291715	0.000435844	0.00113262	0.000250805		0.000656233	0.000261823	9.52351e-05	0.000598065	0.000463997	0.000533828	0.000139645	0.000726694	0.000803755	0.000338513	0.00089117	0.000429855	0.000118025	0.00131553	0.000369748	0.000165695	0.000632971	0.000850977	0.000248438	0.000482998	0.000255442	0.000814287	0.00019598	0.000471593	0.000217667	0.000473589	0.000348214
PPP1R12B	-2.35	0.999709	0	0.210821	5.47256e-05	0	0.000243046	6.92377e-05	5.76286e-05	0.000112363	0.000296373	0.000421424	2.80332e-05	9.64475e-05	0	0	3.09301e-05	0	0.000203394	0	0.000125402		0.000131247	0.000327279	3.1745e-05	3.51803e-05	0	0.000112385	0.000104734	0	0.000128601	0.000101554	0.000142587	0.000117233	0.000118025	0.000438509	0.00010084	9.94168e-05	0.000253189	0.000238274	0.000177456	0	0.000255442	0.000280788	0	2.77408e-05	0.000435335	9.47179e-05	0
TMEM74B	-4.25	0.999709	0	0.00484741	2.73628e-05	0.000267419	0	0.000380807	0.0002017	2.80907e-05	0	7.66225e-05	0.000336398	0	9.42951e-05	0.000703204	0.000371161	0.000291715	0	0.000102965	0.000334406		0	0.000196367	0.000412685	0.000492524	0.000144999	0	6.98227e-05	6.92089e-05	0.000192901	0	0.000213881	0.000468933	0	0	0.000134454	0.000629639	3.16486e-05	0.00037443	0	6.43998e-05	0	0.000280788	0	0.000166445	0.000108834	0.000473589	0.000452678
C10orf111	-23.9	0.999709	0	0.1569	5.47256e-05	2.97133e-05	0	0.000138475	0.000144071	0.000112363	0.000407513	0	0	3.21492e-05	0.000282885	0	0.00015465	8.75146e-05	0	3.43218e-05	0.000292605		9.84349e-05	6.54557e-05	0	0.000281442	0.000115999	0	0.000209468	0.000173022	0.000578704	0	7.12936e-05	7.81555e-05	0	0	0.000436975	0.000132556	0.000189891	0	0.000177456	0.000193199	5.6765e-05	0.000196552	8.39913e-05	0.000110963	0	9.47179e-05	0
PUS7	-9.4	0.999709	0	0.958232	0.000164177	0.000297133	0.000108021	0.000242332	0.000144071	5.61814e-05	0.000148187	0.00030649	0.000224266	0.000160746	0.000345749	0.000351602	9.27902e-05	0.000320887	0	0.000137287	0.000501609		0.000328116	0.000261823	3.1745e-05	3.51803e-05	2.89998e-05	0.000196673	0.000244379	0.000173022	0.000353652	0.000101554	0.000285174	0.000195389	0.000147532	3.98645e-05	0.000302521	0.000463945	0.00022154	0.000102117	0.000212947	0.000354199	0.00022706	0.000224631	8.39913e-05	8.32224e-05	0	0.000473589	0.000383035
PIM2	-31.25	0.999709	0	0.000207093	0.000684069	0.00154509	0.000324062	0.000242332	0.0010085	0.000308997	0.000370466	0.000268179	0.000840996	6.42983e-05	0.000157159	0.000747154	0.00191766	0.000320887	0.000145281	0.000343218	0.000627012		0.000328116	0.000687285	0.000412685	0.000351803	0.000492997	0.000674309	0.000104734	0.000242231	0.000932356	0.000135405	0	0.000117233	0.000118025	7.97289e-05	0.000840336	0.000331389	0.00044308	0.000170195	0.000141965	0.000643998	0.00022706	0.00120739	0	0.000305149	0.000435335	0.000884034	0.000383035
CHI3L1	-4.2	0.999709	0	4.43896e-56	0.000328353	0.000386272	0.000864164	0.000865471	0.00213226	0.000224725	0.00044456	0.000536357	0.00260709	0	0.000125727	0.000439502	0.000340231	0.000408401	0.00159809	0.00102965	0.000919617		0.000426551	0.00111275	0.00057141	0	0.000724995	0.0051978	0.000139645	0.000657485	0.00533693	0.000846281	0.00078423	3.90778e-05	0.0013868	0.00103648	0.000571429	3.31389e-05	0.000189891	0.000987133	7.09824e-05	0.000160999	0.00022706	0.000140394	0.00019598	0.000221926	0.000471613	0.000347299	0.000591963
ADH5	-12.1	0.999709	0	1.18653e-21	0.00210693	0.00534839	0.00202538	0.0029426	0.00296787	0.00221916	0.00281554	0.00283503	0.00569074	0.00247549	0.00622348	0.00654859	0.00683554	0.00618436	0.00200488	0.00617792	0.00677173		0.00242806	0.00245459	0.00387289	0.00306069	0.00252298	0.00202293	0.00219941	0.00498304	0.0074267	0.00155716	0.00299433	0.00472841	0.00123927	0.00314929	0.00453782	0.00308192	0.00522201	0.00354006	0.00195202	0.00241499	0.00263957	0.00505419	0.000895907	0.00274634	0.00616724	0.00378872	0.00685981
ERC2	-0.45	0.999709	0	0.503052	0.000273628	0.000207993	0	0	0.000144071	0	0.000185233	0	2.80332e-05	0	0	4.39502e-05	0	0.000233372	0.000145281	0.000205931	0.000167203		0.00019687	0.000130911	0	0	0	0.000252866	0.000209468	0	0.000192901	6.77025e-05	0.00010694	3.90778e-05	0	0.000239187	3.36134e-05	0	0.000284837	0.000102117	0.00028393	0	8.51474e-05	5.61577e-05	0	0.000194186	7.25558e-05	0	3.48214e-05
BCL7C	-21.15	0.999709	0	0.497066	0.000300991	0.000118853	8.10154e-05	6.92377e-05	0.000115257	0.000168544	0.000259326	0.000498046	8.40996e-05	0	0.000345749	0.000835055	6.18601e-05	0.000233372	0	6.86436e-05	0.000167203		0.00019687	3.27279e-05	9.52351e-05	0.000246262	2.89998e-05	0	0	0	9.64506e-05	6.77025e-05	3.56468e-05	0.000390778	0.000147532	0.000239187	0.000302521	0.00029825	0.000379783	0.000306352	3.54912e-05	3.21999e-05	0.000198677	0.000280788	0	0.00036063	0.000181389	0.000189436	0.000208928
GNGT1	-28.6	0.999709	0	7.95255e-05	0	8.91398e-05	0.000324062	0.000346188	8.64429e-05	0.000252816	0.00011114	0	8.40996e-05	0.000257193	0.000220022	0	0.000927902	8.75146e-05	0	0.000411862	4.18008e-05		3.28116e-05	0.000229095	0.00012698	0	0	0	0.000209468	0.000380649	0	0	3.56468e-05	0.000273544	0.000295064	0.000119593	0.000336134	0	0	0.000850977	0.000141965	0	0.00011353	0.000926602	0.000167983	0.000166445	7.25558e-05	0.000221008	0.00024375
PPARA	-3	0.999709	0	0.220297	0.000218902	0	0	0	0	0.000365179	0.00011114	0	5.60664e-05	3.21492e-05	3.14317e-05	0.000527403	0.00012372	0.000204201	8.71688e-05	3.43218e-05	0.000125402		0.00019687	0	3.1745e-05	0.000175901	5.79996e-05	8.42886e-05	0.000104734	0.000173022	0	0	7.12936e-05	0.000195389	0	0.000279051	0	0.000265111	0.000126594	0.000238274	0.000141965	0	0	0	0	0.00036063	0.000181389	0	0.000278571
LTBP3	-6.65	0.999709	0	0.837924	0.000109451	0	0.000108021	0.000380807	2.88143e-05	2.80907e-05	0	0	8.40996e-05	3.21492e-05	3.14317e-05	8.79005e-05	0.00015465	0.000145858	0	0.000102965	0		0	3.27279e-05	0	0	0.000144999	8.42886e-05	0	3.46045e-05	0.000289352	3.38513e-05	3.56468e-05	0.000117233	0.00032457	7.97289e-05	3.36134e-05	0.000198834	0	0.000170195	0.000106474	9.65997e-05	8.51474e-05	2.80788e-05	2.79971e-05	5.54816e-05	3.62779e-05	0	0.000139285
C6orf163	-4.05	0.999709	0	0.0488487	0	5.94265e-05	0.000108021	3.46188e-05	8.64429e-05	0.000308997	0.00022228	0	8.40996e-05	9.64475e-05	0.000345749	0.000395552	0.000680461	0.000145858	0	0	0.000292605		0.000131247	6.54557e-05	6.349e-05	0.000457344	0	5.61924e-05	0.000209468	0.000207627	6.43004e-05	3.38513e-05	0.000356468	0.000195389	0.000177038	7.97289e-05	0.000235294	0.000397667	0.000348134	0.000306352	0.000461386	0	0	0.000308867	5.59942e-05	0.000277408	0.000362779	6.31453e-05	0.000139285
MAFB	-10.75	0.999709	0	5.86091e-25	5.47256e-05	2.97133e-05	0.000270051	0.000519283	0.000115257	0.000140453	0.000259326	0	0	0	0	0.000175801	0.00012372	2.91715e-05	0.00261506	3.43218e-05	0		0	0.000229095	0.000158725	0.000105541	0.00130499	8.42886e-05	0	6.92089e-05	0.000128601	0	0	0	0.000147532	0.000199322	0.000436975	0	6.32971e-05	0.000408469	0.000674333	3.21999e-05	0	5.61577e-05	0	8.32224e-05	0	0.000126291	0
DNAH5	-25.4	0.999709	0	4.39593e-22	0.000519893	0.000802258	0.000486092	0.000346188	0.000144071	0.000477542	0.000296373	0.00191556	0.000644763	0.00263623	0.00279742	0.00184591	0.00278371	0.00137106	0	0.00322625	0.00267525		0.00177183	0.00101456	0.000412685	0.000879507	0.000231998	0	0.000977517	0.00183404	0	6.77025e-05	0.000249528	0.00195389	0.000737659	0.000558102	0.00110924	0.000364528	0.00145583	0.000442508	0.000248438	0.000418599	0.00269634	0.00190936	0.000559942	0.000610297	0.00286595	0.0016102	0.00104464
ITM2A	-70.9	0.999709	0	1.69616e-16	0.000383079	0.00145595	0.000513097	0.000692377	0.000547472	0.000140453	0.00140777	0.000459735	0.00134559	0.000482238	0.00248311	0.00241726	0.000402091	0.000466744	0.0004649	0.00154448	0.00246625		0.00121403	0.000196367	0.00025396	0.00112577	0.000173999	0.000140481	0.00104734	0.000519067	0.000289352	3.38513e-05	0.000605996	0.000468933	0.000708153	0.000398645	0.000907563	0.00092789	0.00101275	0.00132752	0.000390403	0.000676198	0.000425737	0.00129163	0.000167983	0.000582557	0.00206784	0.00110504	0.000208928
ICAM4	-2.3	0.999709	0	0.00765286	0.000109451	0	0	0	0.000345772	0.000168544	0.00033342	0.000153245	0.000560664	0.000353641	0.000722929	0.000307652	0.00117534	2.91715e-05	0.000174338	0.00096101	0.000209004		0.000164058	3.27279e-05	9.52351e-05	0.000246262	5.79996e-05	0.000449539	6.98227e-05	0.000484463	0.000257202	0.000236959	7.12936e-05	0.0007034	0	0.000757425	0.000168067	0.000265111	0.000411431	0.000476547	0.000319421	0.000289799	0	0.000308867	0	0	7.25558e-05	0.000568307	0.000104464
CSDE1	-5.15	0.999709	0	6.88862e-11	0.00158704	0.00368445	0.0015663	0.00159247	0.00198819	0.00157308	0.00170415	0.00168569	0.00266315	0.00144671	0.00330033	0.00158221	0.00457765	0.00329638	0.000784519	0.0037754	0.00342766		0.00164058	0.00108002	0.00158725	0.00147757	0.00115999	0.00202293	0.000872783	0.00183404	0.00331147	0.00162486	0.00238834	0.00269637	0.00147532	0.0017939	0.00215126	0.00271739	0.0032598	0.00323371	0.00124219	0.00160999	0.000936622	0.0029202	0.000559942	0.00155348	0.00511518	0.00214694	0.00459642
DNLZ	-14.35	0.999709	0	1.91602e-34	0.000109451	5.94265e-05	8.10154e-05	3.46188e-05	0.000230514	0.000112363	0	0.000383112	0	3.21492e-05	9.42951e-05	0.000615303	0.000340231	0.000145858	0.000406788	0.000205931	4.18008e-05		0	0.000392734	0.00019047	0.000281442	0.000463997	0.000393347	0.000104734	0.000207627	0.000160751	0.00358823	0.000463409	0.000664322	2.95064e-05	7.97289e-05	6.72269e-05	0	0.000158243	3.40391e-05	0.000141965	6.43998e-05	0	0	5.59942e-05	0.000305149	0.000290223	0	0.000174107
FAM207A	-0.25	0.999709	0	0.870791	0.000355716	8.91398e-05	0.000216041	0.000103857	5.76286e-05	0.000308997	0.00011114	0.000114934	5.60664e-05	6.42983e-05	0.000220022	0.000791104	9.27902e-05	0.000116686	2.90563e-05	0.000274574	8.36016e-05		6.56233e-05	0.000261823	0.00031745	3.51803e-05	8.69994e-05	0.000112385	0.000139645	0.00031144	0.000321502	0.000203108	0.000320821	0.000117233	0.000118025	0.000199322	0.000168067	0.000198834	3.16486e-05	0.000238274	0.000141965	3.21999e-05	0.000141912	0.000112315	0	0.000166445	7.25558e-05	0.000126291	0.000278571
LRRC74B	-2.7	0.999709	0	1.09688e-25	0.000273628	0.00303075	0.00172833	0.000969328	0.00135427	0.000870811	0.00144482	0.00118765	0.00165396	0.00135027	0.00336319	0.00316442	0.00847484	0.00326721	0	0.00525124	0.00359487		0.0014109	0.0014073	0.000666646	0.00144239	0.000289998	8.42886e-05	0.00188521	0.00197245	0.000546553	0.000406215	0.0010694	0.0021102	0.00144581	0.00139526	0.00215126	0.00251856	0.00208881	0.00163388	0.00248438	0.00270479	0.00190163	0.00373449	0.0010079	0.002247	0.00504263	0.00211537	0.00435267
TMEM104	-33.4	0.999709	0	0.195598	0.000519893	0	2.70051e-05	0.00058852	0.000115257	0.000112363	0.000185233	3.83112e-05	0.000504597	0	0.000345749	8.79005e-05	0.000525811	0.000408401	8.71688e-05	0.000102965	0.000209004		0	0.000523646	0.000158725	0.000105541	0.000231998	0.00022477	6.98227e-05	0	0.000128601	6.77025e-05	0.000285174	0.000195389	0.000118025	3.98645e-05	0.00010084	0.000165695	0.000189891	0.000136156	0.000177456	0	0.00011353	0.000140394	2.79971e-05	5.54816e-05	0.000145112	0.000126291	0.000452678
DPEP2	-5.45	0.999709	0	1.119e-19	5.47256e-05	0.000297133	0.000189036	0	0.000230514	5.61814e-05	0.00011114	3.83112e-05	0.000532631	3.21492e-05	0.000125727	0.000131851	0.00012372	0	0.000319619	6.86436e-05	8.36016e-05		0	0.00045819	6.349e-05	0	0.00118899	0.0022477	0	6.92089e-05	0.000225051	0.000440066	0	0	0.00064914	0	0.000168067	9.94168e-05	0.000126594	0.000204234	7.09824e-05	0.000193199	0.000397355	0	0.000223977	0.000138704	0.000181389	0.000126291	0
GIPC2	-20.95	0.999709	0	0.0118559	0	0.000118853	0.000162031	0.000242332	0.000345772	0.000140453	0.00033342	3.83112e-05	0.000140166	6.42983e-05	0.000974383	0.000439502	0.000402091	0.000145858	0	3.43218e-05	0.000501609		0.000623421	3.27279e-05	0	0	2.89998e-05	0	0.000209468	0.000103813	0.000385802	0.000135405	0	0.000742478	0.000236051	0.000239187	0.000436975	6.62778e-05	0.000253189	0	0.000248438	0.000193199	0.000283825	0.000112315	8.39913e-05	0.000249667	0.000181389	9.47179e-05	0.000174107
GALM	-25.35	0.999709	0	1.10471e-10	0.000656707	0.00163423	0.00143127	0.0011078	0.00103731	0.0015169	0.00170415	0.00214543	0.00274725	0.00154316	0.00336319	0.00355997	0.00386626	0.00212952	0.00153998	0.00473641	0.00250805		0.00131247	0.0011782	0.00177772	0.00239226	0.000521996	0.000112385	0.00223432	0.00183404	0.00160751	0.000913984	0.00242398	0.00265729	0.00165236	0.002352	0.00265546	0.00192206	0.00303826	0.00221254	0.00106474	0.0010626	0.00102177	0.00336946	0.00067193	0.00171993	0.00341012	0.00239952	0.00254196
HOMER2	-0.35	0.999709	0	0.637157	0	0.000237706	2.70051e-05	0	8.64429e-05	0.000477542	0.00011114	0.000268179	0.000196232	0.000128597	6.28634e-05	0	0.00012372	0.000350058	0	6.86436e-05	4.18008e-05		6.56233e-05	9.81836e-05	0.00019047	0.000140721	0.000144999	0.00022477	0	0.00031144	0	0.000338513	0.00010694	0.000234467	5.90127e-05	7.97289e-05	0.000168067	0	6.32971e-05	0.000204234	0	0.000321999	0.000198677	0.000140394	5.59942e-05	0.000110963	0.000145112	0.000252581	0
FBXO2	-2.95	0.999709	0	0.0677753	0.000164177	5.94265e-05	0	0	2.88143e-05	0	0	0	0	0.000128597	9.42951e-05	0.000263701	0.000309301	0	2.90563e-05	0.000274574	0.000250805		0	0	0	0.000351803	0	2.80962e-05	6.98227e-05	6.92089e-05	0.000225051	0	0.000213881	0.000312622	2.95064e-05	0	6.72269e-05	0	0	0	0	6.43998e-05	0	0.000112315	0.000139985	0.000110963	3.62779e-05	0.000378872	0
TIGD6	-0.25	0.999709	0	0.00346868	0.000246265	0.00103996	0.000459087	0.000623139	0	0.000140453	0.000148187	0.000421424	0.000224266	0.000257193	0.000848656	0.000703204	0.000680461	8.75146e-05	0.00023245	0.000171609	0.00142123		0.000951537	0.000392734	0.000158725	0.000316623	0.000202999	0.000196673	0.000488759	0.000449858	0.000160751	0.000203108	0.000356468	0.000625244	0.000177038	0.000597967	0.000504202	0.000231972	0.000474729	0.000204234	0.00028393	0.000225399	5.6765e-05	0.00131971	0.000447953	0.000166445	0.000471613	0.000694598	0.000313392
RRM2B	-37.05	0.999709	0	0.380719	0.000273628	0.000148566	0.000135026	0.000173094	0.000374586	0	0.000148187	0.000574669	0.000392465	0.000160746	0.000440044	0.000615303	3.09301e-05	0.000262544	0.000116225	0.000171609	0.00104502		0.000164058	0.000130911	0.000285705	0.000140721	0.000115999	0.000393347	0.000384025	0.00031144	6.43004e-05	0	0.000392115	7.81555e-05	0.000118025	7.97289e-05	0.000302521	9.94168e-05	0.000348134	0.000340391	0.000212947	0.000225399	8.51474e-05	0.00025271	0	8.32224e-05	0.000145112	0.000536735	0.000278571
RNA_SPIKE_ERCC-00163	-6.25	0.999709	0	0.826583	0.000465167	2.97133e-05	2.70051e-05	0	0.000316957	0.000280907	0.00011114	0.000153245	0.000280332	0.000160746	0.00018859	0.000219751	0.000494881	0.000291715	0.000116225	0.000171609	0.000418008		0.000295305	0.000163639	0.000285705	0.000105541	0.000173999	0	0	6.92089e-05	0.000289352	0	3.56468e-05	0.000312622	0.00032457	0.000199322	6.72269e-05	0.000231972	6.32971e-05	0.000272313	0.00028393	0.0001288	0.00011353	0.000336946	0.000307968	0.00036063	0.000580446	6.31453e-05	0.000278571
MTHFR	-6.25	0.999709	0	0.0525876	0.000383079	0.000772545	0.000189036	0.000207713	0.0002017	0.000280907	0.00033342	0.000191556	0.000448531	0.000128597	0.00110011	0.000175801	0.000525811	0.000291715	0.000174338	0.000514827	0.000836016		0.000164058	0	0.000412685	0.000457344	0.000695995	0.000140481	0	0.000588276	0.000514403	0.000169256	0.000320821	0.000937866	0.000442595	0.00035878	0.000436975	0.000265111	0.000284837	0.000987133	0.00028393	0.000193199	0.00011353	0.000786208	0.000391959	0.000194186	0.000217667	0.000157863	0.000348214
BCAT1	-2.85	0.999709	0	0.0138584	0.000355716	0.000267419	0	0.000207713	0.000144071	5.61814e-05	3.70466e-05	0.000153245	5.60664e-05	0	9.42951e-05	8.79005e-05	3.09301e-05	0	0.000290563	0.000102965	0		0.000131247	0.000163639	6.349e-05	0	0.000144999	0.000140481	0	0.000103813	0.000482253	0.00027081	0.000178234	0.000117233	2.95064e-05	0	0.000134454	0.000198834	0	3.40391e-05	3.54912e-05	0.0001288	0	8.42365e-05	0	0	0.000108834	0.000157863	0.00024375
TTC17	-28.6	0.999709	0	0.782577	0.000246265	0.000564552	0.000297056	0.000207713	0.000144071	0.000168544	0.00022228	0.000268179	0.000560664	0.000514387	0.000691498	0.000307652	0.000587671	0.000233372	0.000290563	0.000652114	0.000334406		0.000131247	0.000261823	6.349e-05	0.000246262	0.000231998	0.000421443	0.000279291	0.00031144	0.000417953	0.000507769	0.000641643	0.000429855	0.000206545	0.000438509	0.000403361	0.000364528	0.000126594	0	0.000319421	0.0001288	0.000823092	0.000168473	5.59942e-05	0.000388371	0.000544168	0.000189436	0.000452678
LRRC73	-31.45	0.999709	0	0.000235808	0.000218902	0.000207993	0.000621118	0.000726996	0.000547472	0.000196635	0.000407513	0.000268179	0.000448531	0.000192895	3.14317e-05	0.000219751	0.000680461	0.000233372	0.000116225	0.000137287	0.000292605		0.000492174	0.000130911	0.000412685	3.51803e-05	0.000144999	0	0.000558581	0.00031144	9.64506e-05	3.38513e-05	3.56468e-05	0.00132864	0.000206545	0.000637831	0.00114286	0.000497084	0.000158243	0.000578664	3.54912e-05	0.000804997	0.00034059	0.00109507	0	0.000138704	7.25558e-05	0.000189436	0.000452678
ANTXR1	-4.1	0.999709	0	0.523295	0.000383079	0.000356559	0.000162031	0	0.000345772	0.000196635	0	0	0.000420498	0.000128597	0.000157159	0.000307652	0.000463951	2.91715e-05	0	0.000137287	0.000585211		3.28116e-05	0.000392734	0.00038094	0.000140721	0.000115999	0.000252866	0.000349113	0.000242231	0.000385802	0.000101554	0.000285174	0.000156311	0	0	0.000201681	0.000463945	0.000189891	0.000170195	0	0.000289799	0.000198677	0.000112315	0.000111988	0.000221926	0	0.000221008	0.000383035
TLR2	-1.05	0.999709	0	2.1378e-10	0.000218902	0.000623979	0.000270051	0.00031157	0.000115257	0.000393269	7.40933e-05	0.000191556	0.000588697	0	0.000251454	8.79005e-05	0.00018558	0.000641774	0.000726406	0.000583471	0.000250805		3.28116e-05	0.000196367	0.0006349	0.000422164	0.000202999	0.00258485	3.49113e-05	0.000380649	0.000964506	0.00111709	0.000392115	0	0.000354076	0.000398645	0.000336134	0.000198834	0.00022154	0.000204234	0.000496877	9.65997e-05	0.00022706	0.000393104	0.000251974	0.00036063	0.00050789	0.000189436	0.000417856
AKAP8L	-27.5	0.999709	0	0.266397	0.000191539	0.000326846	0.000189036	0.000519283	0.000172886	0.000449451	3.70466e-05	0.000153245	5.60664e-05	6.42983e-05	0.000597203	0	0.000402091	0.000554259	5.81125e-05	0.000720758	0.000334406		0.000360928	9.81836e-05	6.349e-05	0.000105541	5.79996e-05	0.000196673	0.000174557	0.000207627	3.21502e-05	0.000101554	3.56468e-05	0.000234467	0.000147532	0.000478374	0	0.000331389	0.000411431	0.000272313	0.000390403	0.000354199	0.00034059	0.000673892	2.79971e-05	0.000110963	0.000181389	0.000221008	0.000278571
CBR4	-9.55	0.999709	0	0.559294	0.000629344	0.000653692	0.000162031	0.000207713	0	0.000252816	0.000296373	0.000229867	0.000196232	9.64475e-05	0.000251454	0.000527403	0.000896972	0.000700117	8.71688e-05	0.000480505	0.000585211		0.000295305	0.000425462	0.000412685	0.000457344	0.000463997	0.000168577	0.000104734	0.000692089	0.000707305	0.000304661	0.000463409	0.000117233	0.000118025	0.000279051	0.000436975	0.000497084	0.000474729	0.000238274	0	6.43998e-05	0.000255442	0.000449262	0	0.000416112	0.000544168	0.000221008	0.000313392
C6orf120	-31.4	0.999709	0	0.561616	2.73628e-05	8.91398e-05	2.70051e-05	0.000276951	0	0	0.000148187	0	8.40996e-05	0.000128597	9.42951e-05	0.000175801	0.00018558	0	0	0	0		3.28116e-05	0	6.349e-05	0.000211082	0	0	0	3.46045e-05	0.000450103	0.000338513	3.56468e-05	0.000156311	0	0	0.000201681	0.000331389	3.16486e-05	6.80782e-05	3.54912e-05	3.21999e-05	0	5.61577e-05	8.39913e-05	0	0.000145112	6.31453e-05	0.000104464
SRD5A1	-13.1	0.999709	0	0.344395	0.000164177	0.000297133	0.000216041	0.000692377	8.64429e-05	0.000140453	0.000259326	0.000727914	0.000168199	0.000160746	0.000534339	0.000791104	0.000278371	0.000175029	0.000174338	0.000171609	0.000209004		0.000426551	0.000294551	0.000222215	0.000386983	2.89998e-05	0.000365251	0	0.000449858	0.000225051	0.000236959	0.000142587	0.000508011	0.000177038	0.00035878	0.000235294	0.000265111	0.00022154	0.000612703	7.09824e-05	0.000450799	0.000255442	5.61577e-05	0.000111988	0.000443853	0.000362779	0.000442017	6.96427e-05
CEP83	-4.5	0.999709	0	0.0110361	0.000738795	0.00118853	0.000351067	0.00100395	0.000432214	0.000730358	0.00144482	0.000766225	0.00103723	0.000675133	0.00160302	0.000747154	0.00173208	0.000729288	0.000639238	0.00161312	0.00179743		0.000984349	0.000556374	0.000761881	0.00168865	0.000521996	2.80962e-05	0.00132663	0.000726694	0.000385802	0.000406215	0.000819877	0.0017585	0.00123927	0.000757425	0.000638655	0.000994168	0.00136089	0.00142964	0.00088728	0.000998197	0.00122045	0.00140394	0.000755921	0.00110963	0.00221295	0.000820888	0.00177589
CENPU	-1	0.999709	0	6.12609e-10	0.00366661	0.00184222	0.00094518	0.00225023	0.00118139	0.000730358	0.00281554	0.00172401	0.00106526	0.000675133	0.001383	0.000703204	0.00120627	0.00189615	0.000377731	0.00116694	0.000668812		0.0017062	0.00108002	0.00203168	0.00144239	0.00147899	0.00103956	0.000733138	0.00186864	0.00183256	0.00104939	0.00256657	0.00164127	0.000855684	0.000637831	0.00144538	0.00142497	0.00193056	0.00129348	0.00088728	0.000901597	0.000482502	0.00160049	8.39913e-05	0.000610297	0.00181389	0.00157863	0.000974998
SUSD4	-21.8	0.999709	0	2.35559e-06	0.000410442	0.000326846	0.000378072	0.000103857	0.000144071	8.4272e-05	0.000518653	0.000153245	0.000644763	0.000192895	0.00141443	0.000879005	0.000989762	0.000933489	0.000145281	0.0018877	0.00108682		0.000590609	0.000163639	0.00031745	0.000246262	2.89998e-05	0.000196673	0.000244379	0.000553672	0.000225051	0.000338513	0.000998111	0.00144588	0.000236051	0.000438509	0.000571429	0.000530223	0.000253189	0.00108925	0	0.000515198	0.000255442	0.00126355	0.000167983	0.000305149	0.000544168	0.000505162	0.000417856
CD86	-25.1	0.999709	0	9.66558e-23	0.000410442	0.000356559	0.000432082	0.000138475	0.000691543	0.000224725	0.000148187	0	0.000168199	0	0.000125727	0.000131851	0.00015465	0.000145858	0.00188866	0.000480505	0		0	6.54557e-05	0.000222215	0	0.000463997	0.00022477	0.000244379	6.92089e-05	0.000868056	0.000338513	0.000213881	0.000234467	0.000118025	3.98645e-05	3.36134e-05	0.000265111	3.16486e-05	0	0.000177456	0.0001288	0.00011353	0.000112315	0.000139985	0.000194186	0.000290223	6.31453e-05	0.000313392
SUMF1	-26.4	0.999709	0	1.60083e-13	0.00106715	0.0029119	0.0015663	0.00173094	0.00123901	0.00123599	0.00129663	0.00118765	0.00165396	0.00160746	0.00370894	0.00496638	0.00417556	0.00262544	0.000639238	0.0048737	0.00401287		0.00124684	0.00124366	0.00149202	0.002146	0.000608996	0.00143291	0.00129172	0.00218008	0.00266847	0.00179412	0.0010694	0.0024619	0.00156384	0.00211282	0.00262185	0.00268425	0.00158243	0.0023487	0.000816298	0.0013846	0.00201516	0.00311675	0.000727924	0.00127608	0.00192273	0.00214694	0.00257678
OVOL2	-4.6	0.999709	0	0.000266369	0.000629344	0.000891398	0.000540103	0.000519283	0.000518657	0.000449451	0.00044456	0.000344801	0.000672797	0.000417939	0.00106868	0.00145036	0.00108255	0.00163361	0.00023245	0.000617792	0.00133762		0.00019687	0.000523646	0.00107933	0.000246262	8.69994e-05	5.61924e-05	0.000139645	0.000761298	0.000417953	0	0.000641643	0.00113326	0.000531114	0.000199322	0.00121008	0.00152439	0.00113935	0.000442508	0.000177456	0.000837197	0.000397355	0.000898523	0.000335965	0.000499334	0.000943225	0.00126291	0.000800891
ZNF462	-5.85	0.999709	0	0.232387	8.20883e-05	5.94265e-05	0.000162031	0.00031157	0.000691543	2.80907e-05	0	0.000114934	5.60664e-05	0.000257193	0.00018859	8.79005e-05	0.00018558	8.75146e-05	5.81125e-05	0.000274574	0.000209004		3.28116e-05	0	6.349e-05	0.000246262	0.000173999	0.00022477	0.000139645	0	9.64506e-05	0.000236959	0.000249528	0.000508011	0.000177038	7.97289e-05	0.000369748	0.000198834	0	3.40391e-05	0	0	0.00011353	0.000140394	0.000111988	2.77408e-05	0.000145112	0.000410444	0.000417856
SMPD1	-8.2	0.999709	0	0.0123707	2.73628e-05	0	0.000513097	0.000553902	0.000230514	0.000168544	0	0	5.60664e-05	3.21492e-05	6.28634e-05	4.39502e-05	0.00021651	0.000116686	0	0.000102965	0		3.28116e-05	6.54557e-05	0.000158725	0.000105541	8.69994e-05	0	0.000139645	0	3.21502e-05	3.38513e-05	0.000178234	0.000234467	0.000206545	3.98645e-05	0.00097479	0.000132556	0.000538026	6.80782e-05	0	0	0.00011353	0.00025271	0.000111988	0	7.25558e-05	6.31453e-05	0
REEP6	-1.15	0.999709	0	2.86817e-13	0.00123132	0.00124796	0.000918174	0.00131552	0.00129664	0.00084272	0.00140777	0.000689602	0.00266315	0.000707282	0.00279742	0.00470268	0.00358789	0.00163361	0.000552069	0.00329489	0.00163023		0.00101716	0.00108002	0.00133329	0.000949868	0.00159499	0.000786694	0.000139645	0.00221469	0.000771605	0.000406215	0.00110505	0.00160219	0.000737659	0.00187363	0.00171429	0.00162381	0.00253189	0.00187215	0.00124219	0.00160999	0.00258281	0.00249902	0.000447953	0.00127608	0.00199528	0.0013892	0.00184553
XRCC3	-3.75	0.999709	0	0.700791	0.000136814	2.97133e-05	2.70051e-05	0	0	0	0.000185233	3.83112e-05	0	0	0.00018859	0.000175801	9.27902e-05	2.91715e-05	5.81125e-05	0.000137287	4.18008e-05		6.56233e-05	3.27279e-05	0	0.000281442	0	5.61924e-05	0.000104734	0	0.000225051	0	0.000534702	0	0	0	6.72269e-05	6.62778e-05	0.000253189	0.000102117	7.09824e-05	3.21999e-05	0.000141912	0.000168473	0	2.77408e-05	3.62779e-05	0	6.96427e-05
CDK16	-31.25	0.999709	0	0.0118463	0.000191539	0.00106968	0.000162031	0.000934709	0.000922057	0.000280907	0.000296373	0.000344801	0.000560664	0.000225044	0.000502907	8.79005e-05	0.00105162	0.000175029	0.000581125	0.000343218	0.000376207		0.00019687	0.000261823	0.000222215	7.03606e-05	0.000260998	0.000477635	0.000139645	0.00062288	0.000964506	0.00054162	0.000499055	0.00125049	0.00064914	0.000318916	0.000537815	0.000198834	0.000379783	0.000442508	7.09824e-05	0.000321999	0.000482502	0.000842365	8.39913e-05	0.00108189	3.62779e-05	0.000505162	6.96427e-05
WAPAL	-20.4	0.999709	0	0.634103	2.73628e-05	0	0.000162031	0.000242332	0	0	0.000481606	0.000229867	5.60664e-05	0	0	8.79005e-05	9.27902e-05	0.000145858	0.000174338	0.000171609	8.36016e-05		3.28116e-05	0	0	0.000140721	2.89998e-05	5.61924e-05	0	0	0.000128601	0.000338513	0.000178234	0.000117233	0	0.000398645	0	3.31389e-05	0.00022154	0.000306352	0.000106474	0	0.000170295	0	0	0.000110963	0.000108834	0.000157863	0.000174107
CLCA4	-14.05	0.999709	0	1.42227e-47	0.000246265	0.000594265	0.00305158	0.00252718	0.00132546	0.000870811	0.0016671	0.000842847	0.00199036	0.000642983	0.00091152	0.000703204	0.000340231	0.000641774	0.00656671	0.000892367	0.000627012		0.000360928	0.000785469	0.00215866	0.00390501	0.00258098	0.00337154	0.00188521	0.000692089	0.00408308	0.000406215	0.00270916	0.0007034	0.000177038	0.000597967	0.0012437	0.00162381	0.00161408	0.00132752	0.00141965	0.000547398	0.000539267	0.000814287	0.000363962	0.00105415	0.000326501	0.000947179	0.00121875
IPO8	-18.3	0.999709	0	0.928456	2.73628e-05	0	8.10154e-05	0.000138475	8.64429e-05	8.4272e-05	0	0.000383112	8.40996e-05	0	6.28634e-05	0.000131851	6.18601e-05	0.000116686	0.000261506	6.86436e-05	0.000250805		3.28116e-05	3.27279e-05	3.1745e-05	0.000422164	2.89998e-05	0.000168577	0.000104734	0	0.000192901	0.000101554	0.000178234	0.000117233	0.000147532	0	0.000302521	0.000132556	0.000158243	6.80782e-05	0.000212947	6.43998e-05	2.83825e-05	5.61577e-05	0	0.000221926	0.000108834	0	0.000174107
HJURP	-9.55	0.999709	0	0.494295	0.000191539	5.94265e-05	0	0.000103857	0	0.000308997	3.70466e-05	3.83112e-05	0.000168199	6.42983e-05	0.000282885	8.79005e-05	0	0.000175029	0.000145281	6.86436e-05	8.36016e-05		0.000262493	0	0.00012698	0.000211082	0.000202999	0.000646213	0.000139645	0.000138418	0.000128601	0	0.000356468	0.000117233	2.95064e-05	7.97289e-05	0.00010084	0	6.32971e-05	6.80782e-05	0	0.0001288	0.000170295	0	0	0	3.62779e-05	9.47179e-05	0.000139285
SFXN3	-1.7	0.999709	0	3.86094e-06	0.000191539	0.000921111	0.00108021	0.00159247	0.000518657	0.000252816	0.000518653	0.00061298	0.000420498	0.000610834	0.000660066	0.00136246	0.00151557	0.00075846	0.000610181	0.00096101	0.00121222		0.000295305	0.000490918	0.00044443	0.000246262	0.000869994	0.00022477	0.000488759	0.000795903	0.000803755	0.000236959	0.000320821	0.00113326	0.000590127	0.00119593	0.00164706	0.000231972	0.00088616	0.00132752	0.00173907	0.000386399	0.00034059	0.00143202	0.000279971	0.000305149	0.000979503	0.000947179	0.00156696
AGPAT3	-7.25	0.999709	0	0.827285	2.73628e-05	0	0	0	0	2.80907e-05	0	0.000191556	0.000224266	0	9.42951e-05	0.000219751	3.09301e-05	5.83431e-05	5.81125e-05	0.000274574	0		0.000131247	6.54557e-05	3.1745e-05	0	0	0	0	0	3.21502e-05	3.38513e-05	3.56468e-05	0	0	0	0	6.62778e-05	9.49457e-05	6.80782e-05	0.000319421	3.21999e-05	0	8.42365e-05	0	0.000110963	0.000108834	9.47179e-05	0
ROMO1	-4.6	0.999709	0	1.13125e-108	0.128797	0.172842	0.09468	0.124489	0.112606	0.0741313	0.107361	0.105279	0.210137	0.118952	0.171586	0.187184	0.25041	0.189527	0.0627615	0.193575	0.199055		0.100666	0.100802	0.121266	0.102515	0.0850564	0.0694257	0.0662966	0.158281	0.161812	0.0820554	0.126083	0.187026	0.0887256	0.109548	0.153345	0.159199	0.157262	0.141569	0.09863	0.13115	0.132972	0.174959	0.0561342	0.13421	0.1963	0.221924	0.209276
CCDC112	-5.45	0.999709	0	0.0137908	0.000164177	0.000326846	0.000702133	0.00058852	0.000374586	0.000308997	0.000296373	0.000229867	0.000728863	0.000128597	0.000691498	0.000395552	0.000618601	0.000787631	0.000319619	0.000411862	0.000668812		0.000492174	6.54557e-05	0.000476175	0.000175901	0.000144999	8.42886e-05	0.000139645	0.000553672	0.000900206	0.000101554	0.000285174	0.000312622	0.000737659	0.000239187	0.000504202	0.00115986	0.000284837	0.000919055	0.00028393	0.000998197	0.000425737	0.00143202	0.000279971	5.54816e-05	0.000326501	0.000505162	0.00076607
CLGN	-36.55	0.999709	0	0.525004	8.20883e-05	8.91398e-05	8.10154e-05	0	0.0002017	8.4272e-05	0	0.000421424	2.80332e-05	9.64475e-05	0.000220022	0.000263701	9.27902e-05	0.000495916	0	0.00037754	0.000125402		3.28116e-05	0	0	3.51803e-05	0	0	0.000104734	0.000138418	0.000128601	0	0.00010694	0.000156311	0.000413089	0.000199322	0.000369748	0.000132556	0.00022154	0	7.09824e-05	0.000160999	0.00011353	0.000280788	0.000111988	2.77408e-05	0.000253945	9.47179e-05	0.000383035
ADAM28	-32.25	0.999709	0	1.12096e-29	0.00333826	0.00311989	0.0020794	0.00325417	0.0119867	0.00865193	0.00255622	0.00249023	0.00263512	0.00723356	0.00914663	0.00294467	0.00649531	0.00743874	0.00639238	0.00710461	0.00225724		0.00406864	0.00216004	0.00273007	0.00365875	0.00417597	0.00255675	0.00286273	0.00321822	0.00691229	0.00365594	0.00470538	0.00636968	0.00345224	0.00597967	0.00336134	0.00281681	0.00329145	0.00479951	0.00291028	0.00357419	0.00411546	0.00482956	0.00419956	0.00493786	0.00602213	0.00584094	0.00532767
IYD	-136.25	0.999709	0	0.0420318	0.000437804	0.000653692	0.000108021	0.000553902	0.0004034	0.000505632	0.000407513	0.000536357	0.000252299	6.42983e-05	0.000597203	0.00118666	0.00018558	0.000525088	0	3.43218e-05	0.000376207		0.000164058	0.000360007	0.000539665	0	0.000115999	0.000365251	0	0.000830507	0.000257202	0	0.000320821	0.000156311	0.00032457	0.000119593	0.000504202	0.000596501	0.000158243	0.000204234	0.00028393	0.0001288	0.000283825	0.00073005	0.000111988	0.000249667	0	0.000536735	0.000278571
MFAP4	-124.15	0.999709	0	4.11441e-27	0.000109451	0.000326846	0.000432082	0	8.64429e-05	0.000393269	7.40933e-05	7.66225e-05	8.40996e-05	0.000225044	0.00201163	0.000131851	0.000340231	0.000816803	0	0.00243685	0.000250805		0.000426551	0	0	3.51803e-05	0	0	0.00129172	0.000449858	0	0	3.56468e-05	0.000312622	0.000265557	0.000877018	0.000201681	0	0.000189891	0.000272313	0	0.0001288	0	0.000112315	0	0	0	0.000221008	0
EMC8	-113.75	0.999709	0	0.971224	2.73628e-05	5.94265e-05	0.000351067	0.000207713	0.0002017	0.000140453	0.00033342	0.000229867	0.000224266	0.000128597	9.42951e-05	0.000131851	0.000309301	0.000204201	5.81125e-05	0.000205931	0.000167203		9.84349e-05	0.000130911	9.52351e-05	3.51803e-05	2.89998e-05	5.61924e-05	6.98227e-05	0.00031144	9.64506e-05	3.38513e-05	3.56468e-05	0.000156311	5.90127e-05	0.000119593	0.000168067	0.000364528	0.00022154	0	0.000106474	0.000225399	0.000170295	5.61577e-05	2.79971e-05	0.00036063	3.62779e-05	0.000189436	0.000104464
NOP9	-98.05	0.999709	0	0.552711	0	0.000356559	0.000189036	6.92377e-05	5.76286e-05	0	0.00011114	0	0.000140166	0	0.000157159	0.000175801	0.000309301	0	0.000145281	6.86436e-05	4.18008e-05		0	6.54557e-05	0	3.51803e-05	0	8.42886e-05	0	0.000103813	0.000192901	0.000101554	7.12936e-05	0	0	0.000239187	0	0	0.000379783	0.000170195	0.000106474	6.43998e-05	2.83825e-05	0.000112315	0	0.000221926	0	0	0
NPHP4	-92.9	0.999709	0	0.0622147	0.000164177	0.000118853	0.000486092	6.92377e-05	0.000144071	0	0.000296373	0.00030649	0.000196232	6.42983e-05	0.000157159	8.79005e-05	0.000618601	0.000145858	2.90563e-05	0.000137287	8.36016e-05		0	9.81836e-05	0	0	5.79996e-05	0	3.49113e-05	0.000207627	0.000225051	0	0.000285174	3.90778e-05	2.95064e-05	7.97289e-05	0.000470588	0	0.000189891	0.000306352	3.54912e-05	0.000160999	0.00022706	2.80788e-05	2.79971e-05	5.54816e-05	0.000326501	3.15726e-05	6.96427e-05
NCALD	-154.3	0.999709	0	0.00686429	0.000136814	0.000564552	0.000567108	0.000276951	0.000115257	0.000280907	0.00044456	3.83112e-05	0.000588697	0.000514387	0.000942951	0.00101086	0.000618601	0.000845974	0.000145281	0.000686436	0.00054341		0.00039374	0.000130911	0	3.51803e-05	5.79996e-05	0.000140481	0	0.000519067	0.000128601	0	0.000142587	0.000820633	0.000206545	7.97289e-05	0.000268908	0.000364528	0.000538026	0.000714821	0.000177456	0.000257599	0.00034059	0.000617735	5.59942e-05	0.00036063	0.000399057	0.000378872	0.000452678
BAZ2A	-95.9	0.999709	0	0.0748676	0.000465167	5.94265e-05	0.000243046	0.000484664	0.000777986	0.000393269	7.40933e-05	0.000344801	0.000196232	0.000192895	0.000345749	0	0.000433021	0.000233372	0.000261506	0	0		0	9.81836e-05	0.00025396	7.03606e-05	5.79996e-05	5.61924e-05	0.000349113	0.000242231	9.64506e-05	3.38513e-05	0.000213881	0.000156311	5.90127e-05	0.000318916	0.000336134	6.62778e-05	6.32971e-05	0.000102117	0	0	2.83825e-05	0.000786208	0	5.54816e-05	0.000108834	6.31453e-05	0.000313392
PRKCZ	-49.75	0.999709	0	0.646978	0	0	0.000135026	0.00031157	0	0	0	7.66225e-05	0.000252299	9.64475e-05	9.42951e-05	4.39502e-05	0.00012372	5.83431e-05	2.90563e-05	0.000343218	0.000167203		0	6.54557e-05	0.00025396	0	0.000260998	2.80962e-05	0.000174557	0	0.000128601	0	0.000213881	0	0	0	0.000268908	0	0	0.000204234	0.000141965	9.65997e-05	0	5.61577e-05	0	0	0.000253945	3.15726e-05	0.000208928
GLRX5	-22.55	0.999709	0	0.628463	2.73628e-05	0.000118853	0.000108021	0.000346188	0.000115257	5.61814e-05	7.40933e-05	0	0.000196232	6.42983e-05	0.000125727	0	0	0	0	3.43218e-05	0.000167203		0	0	0.00019047	0.000105541	0	2.80962e-05	0	0.000207627	0	0.000101554	0.000178234	0.000234467	0	0	0.00010084	0.000132556	3.16486e-05	0	0	6.43998e-05	2.83825e-05	0.000112315	0	0	0	3.15726e-05	0.000139285
RUSC1-AS1	-48.45	0.999709	0	0.778708	0.000109451	0	0.000162031	0.000138475	0	0.000140453	0	3.83112e-05	0.000112133	6.42983e-05	9.42951e-05	4.39502e-05	9.27902e-05	5.83431e-05	0	0	8.36016e-05		0	0	0	0	5.79996e-05	0	0	0.000138418	3.21502e-05	0	0.000213881	0	0	7.97289e-05	0.00010084	0.000265111	0	0.000238274	0	0.000160999	0.00011353	0.00025271	0	0.000138704	0	3.15726e-05	0
S100A1	-101.1	0.999709	0	0.0169016	0.000328353	0	8.10154e-05	0.000138475	0.000115257	0.000337088	0.000296373	0.000344801	0	0.000128597	0.000471476	0	0.00018558	5.83431e-05	0.000116225	0.000274574	0		0	0	0	0.000105541	0.000144999	0	0.000174557	6.92089e-05	0	0	0	0.000664322	8.85191e-05	0.000159458	0	0	0.000189891	0	0	0	0	0.000140394	0.000111988	8.32224e-05	3.62779e-05	6.31453e-05	6.96427e-05
IL7	-65.9	0.999709	0	0.52142	0.000300991	0.000207993	0	0.000242332	0.000288143	0.000112363	0.000148187	7.66225e-05	0.000112133	0	0.000220022	0.000175801	0.000494881	0.000291715	0.000261506	0.000205931	0		0.000131247	0.000130911	6.349e-05	0	0.000144999	0	6.98227e-05	0.000484463	9.64506e-05	0.000169256	0.000142587	3.90778e-05	8.85191e-05	0.000199322	0.000168067	0.00029825	3.16486e-05	3.40391e-05	7.09824e-05	0.000257599	0.000283825	0.000280788	8.39913e-05	8.32224e-05	7.25558e-05	0.000347299	0.000174107
STC1	-126.85	0.999709	0	1.07916e-84	0.000820883	0.000326846	0.000648123	0.000484664	0.00155597	0.000646086	0.000926166	0.000383112	0.000140166	0.000128597	0.000345749	0.000131851	0.000989762	0.00137106	0.00116225	0.000308896	8.36016e-05		6.56233e-05	0.000130911	0.000730136	0.000246262	0.000231998	0.00081479	0.000244379	0.000242231	0.00765175	0.000236959	0.000356468	7.81555e-05	0.000177038	3.98645e-05	0.000336134	0	0.000158243	0.000204234	7.09824e-05	0.000193199	0.000312207	0.000112315	0.00019598	0.000554816	0	0.000757743	3.48214e-05
ZNF41	-24.45	0.999709	0	0.860867	8.20883e-05	5.94265e-05	0	0.000173094	0.000144071	8.4272e-05	0	0	0	0.000289343	3.14317e-05	0.000219751	0.00012372	8.75146e-05	0	0.000171609	0		3.28116e-05	0	0.000285705	0	0.000318998	0	0.000104734	0	6.43004e-05	0.000101554	0.00010694	0	0	0	0.000235294	3.31389e-05	0.000126594	0.000136156	0.000141965	3.21999e-05	0.00011353	0.000140394	0	5.54816e-05	0	3.15726e-05	0
ZNF483	-89.35	0.999709	0	0.888965	0.000246265	0.000148566	8.10154e-05	0.000173094	5.76286e-05	0.000140453	0	0.000383112	0	3.21492e-05	6.28634e-05	0.000131851	0.00018558	0.000175029	0	0.000102965	0.000209004		3.28116e-05	3.27279e-05	0	0.000140721	0	0	6.98227e-05	0.000138418	6.43004e-05	0	0.000320821	3.90778e-05	5.90127e-05	0.000119593	0.000268908	0.000132556	0	0.000170195	0	0.000193199	5.6765e-05	0.00025271	5.59942e-05	0.000277408	0	6.31453e-05	0.000139285
FCGR3A	-0.4	0.999709	0	2.28481e-09	0.000109451	0.000207993	2.70051e-05	0.000138475	0.000144071	0	7.40933e-05	0	2.80332e-05	0	0	0	0.00012372	0.00037923	0.000668294	0.000102965	0		0	3.27279e-05	0.00012698	0	8.69994e-05	0.000702405	3.49113e-05	0	0.000257202	0.000101554	0.000570349	7.81555e-05	0	0	0	9.94168e-05	6.32971e-05	6.80782e-05	0.000106474	0	0.00011353	0	0	0.000138704	0.000435335	3.15726e-05	0
C10orf10	-147.4	0.999709	0	1.59471e-10	0	0.000980538	0.000324062	0.00138475	0.0018153	0.000617995	0.00033342	0.00061298	0.000336398	0.00298987	0.00172874	0.00149431	0.00105162	0.00154609	0.000174338	0.00130423	0.00167203		0.000164058	0.000752741	0.000539665	0	0.000144999	0.000140481	0.00111716	0.000830507	0.000225051	0.00054162	0.000570349	0.000508011	0.000501608	0.000279051	0.00137815	0.000198834	0.000474729	0.000714821	0.000319421	0.000160999	0.000851474	0.000898523	0.000251974	0.00036063	0.00105206	0.000410444	0.000905356
CLHC1	-119	0.999709	0	0.00355079	0.000191539	0.00109939	0.000702133	3.46188e-05	0.000316957	0.000168544	0.00022228	0.000689602	0.00106526	0.000482238	0.000848656	0.00123061	0.00015465	0.000933489	0.000145281	0.00075508	0.000919617		0.000557798	0.000425462	0.00012698	0.000246262	0	5.61924e-05	0.000349113	0.000899716	0.000321502	0.000236959	0.000677289	0.000234467	0.000265557	0.000478374	0.000571429	0.000463945	0.000727917	0.000102117	0.000461386	0.000772798	0.000425737	0.00047734	2.79971e-05	0.000110963	0.000145112	0.00059988	0.000487499
WDR90	-13.35	0.999709	0	1.4324e-15	0.000136814	0	5.40103e-05	0.000173094	8.64429e-05	8.4272e-05	0.00011114	0	0	0.000160746	0.000157159	0	0.000556741	0.000350058	0	3.43218e-05	8.36016e-05		0	3.27279e-05	3.1745e-05	0	0	0	0.000244379	3.46045e-05	0.000128601	6.77025e-05	0.000249528	7.81555e-05	0.000531114	0.000438509	0.00194958	0.000132556	0	0.000238274	0.000177456	0	8.51474e-05	2.80788e-05	0	2.77408e-05	0	0.000157863	0.000104464
SIRT1	-103.35	0.999709	0	0.334092	0.000273628	0	0.000351067	0.000276951	0.000144071	0.000196635	0	0	2.80332e-05	0.000128597	0.000377181	0.000175801	9.27902e-05	0.000350058	0.000377731	0.000205931	0.000125402		0	0.000130911	0.000158725	3.51803e-05	2.89998e-05	0	0.000384025	0	0.000160751	0	7.12936e-05	7.81555e-05	0.000206545	0	0.000134454	0.000530223	0.000189891	0.000136156	0.000141965	0.0001288	8.51474e-05	0.000365025	0	2.77408e-05	0.000290223	0.000473589	0.000417856
NUP205	-71.5	0.999709	0	0.379736	0.000273628	0	0.000108021	0.000380807	0.000144071	0.000224725	0.000370466	0	0.000252299	0	0.000408612	4.39502e-05	3.09301e-05	0.000145858	0	0	0.000250805		0	0	3.1745e-05	0.000140721	0	8.42886e-05	3.49113e-05	0.000207627	0.000192901	0	0.000142587	0.000390778	0	3.98645e-05	0	0	0.000253189	0.000408469	0	0	8.51474e-05	0.000196552	0	0	7.25558e-05	3.15726e-05	6.96427e-05
PRDM1	-54.25	0.999709	0	0.210443	0	0.000148566	0.000243046	6.92377e-05	0	8.4272e-05	0.000259326	0	0.000112133	6.42983e-05	0	0	0	8.75146e-05	0.000552069	0.000137287	0.000418008		0	0	0	0	5.79996e-05	8.42886e-05	0	0.000103813	0.000225051	0.000135405	0.00010694	0.000273544	0	3.98645e-05	0	0.000165695	0.000126594	6.80782e-05	0.00028393	0	0	0.000112315	2.79971e-05	0	0	0.000189436	0
TAF6L	-53.55	0.999709	0	0.159421	0.000109451	0.000297133	0.000189036	0	0.000115257	0.000168544	0	0.000153245	0.000140166	0.000128597	0.00018859	0	0.00021651	0	0.000319619	0.000240253	4.18008e-05		0.00019687	0	0	0	0	0	0.000244379	0	0	6.77025e-05	0	0	0.000236051	3.98645e-05	0.000302521	0.000397667	0.000569674	3.40391e-05	0.000212947	0	0	0.000308867	0	0.000249667	0.000253945	0.000252581	0.000139285
ABCG1	-85.1	0.999709	0	0.717514	0.000218902	0	0	0	0.000144071	0.000168544	0.000148187	0	0.000224266	3.21492e-05	0.000471476	0.000219751	0.00015465	0.000204201	5.81125e-05	3.43218e-05	0.000167203		0.00019687	0	0	0	0.000144999	8.42886e-05	0	0.000207627	9.64506e-05	3.38513e-05	7.12936e-05	0.000156311	0.000118025	0	0.000168067	0	0.000158243	0.000170195	0	0	0.000141912	0	0.000139985	0	0.000253945	6.31453e-05	0.000174107
FIZ1	-22.75	0.999709	0	0.516117	0.000109451	0	8.10154e-05	0.000138475	0.000115257	2.80907e-05	0	0	0	3.21492e-05	0.000220022	8.79005e-05	0.00012372	0.000116686	0.000116225	0	0		0	0	9.52351e-05	0	0.000144999	0.000112385	0.000209468	0	0	3.38513e-05	0.000285174	3.90778e-05	8.85191e-05	0	3.36134e-05	0	9.49457e-05	6.80782e-05	0.000248438	9.65997e-05	5.6765e-05	0.000168473	0	5.54816e-05	0.000145112	6.31453e-05	0
ZCCHC18	-31.1	0.999709	0	0.774347	0	5.94265e-05	0	0.000276951	0	0.000196635	0	0.000153245	2.80332e-05	0	0.000157159	0.000131851	0.00018558	5.83431e-05	0	0.000102965	0		0	0	0	7.03606e-05	0	2.80962e-05	0	0.000103813	0	0.000101554	0.000213881	0	0	0.000159458	0	0	0	0.000136156	3.54912e-05	3.21999e-05	0	0	0	0.000277408	0.000145112	0.000157863	0
LHFPL2	-67.05	0.999709	0	0.490088	0.000164177	0	0.000243046	0	2.88143e-05	0.000308997	0.000296373	0.000114934	0.000196232	0	0.000125727	0.000131851	9.27902e-05	0.000175029	0	0	0.000501609		9.84349e-05	0.000130911	0	0	2.89998e-05	0.000337154	0	0.000138418	0	0.00027081	0.000178234	3.90778e-05	5.90127e-05	0	3.36134e-05	3.31389e-05	0.000126594	0.000136156	0.000141965	0.000160999	0.00011353	0	0	8.32224e-05	0.000290223	0.000126291	0
PRKCI	-62.85	0.999709	0	0.696406	0	5.94265e-05	0.000108021	3.46188e-05	8.64429e-05	0.000196635	0.00011114	0	2.80332e-05	0	0.00018859	0.000175801	0	0.000175029	0	0.000274574	0		0	0	0	0	5.79996e-05	0	0.000174557	0	0.000128601	0.000101554	0.000213881	3.90778e-05	0	0	0	0.000132556	0.000158243	6.80782e-05	0	3.21999e-05	2.83825e-05	8.42365e-05	0	2.77408e-05	0	0.000189436	6.96427e-05
IL36G	-3.15	0.999709	0	1.22302e-06	8.20883e-05	0.000148566	0.000486092	6.92377e-05	0	0	0	0	0.000504597	0	0	0.000175801	0.00012372	0.000320887	0.000261506	3.43218e-05	0		9.84349e-05	0	0.0006349	0	0.000840994	0.000112385	0	0	0.000225051	0	0	0.000429855	0.000265557	0	0	0	9.49457e-05	0	7.09824e-05	0	0.000141912	2.80788e-05	0	0.000166445	0.000217667	0	0
DLEC1	-66.45	0.999709	0	0.813392	0.000136814	0.00017828	8.10154e-05	0	0.000115257	8.4272e-05	0	0	8.40996e-05	0	3.14317e-05	0.000219751	6.18601e-05	5.83431e-05	0	0.000205931	0.000167203		0	0	0	0	0.000115999	0	0	0.000138418	3.21502e-05	0	0.000178234	0	0	0.000239187	0	6.62778e-05	9.49457e-05	0.000136156	0	9.65997e-05	5.6765e-05	0.000224631	0	0	7.25558e-05	0	6.96427e-05
CDK14	-19.05	0.999709	0	0.907145	2.73628e-05	8.91398e-05	0	0	0	0.000112363	0	0.000114934	0.000252299	6.42983e-05	0.00018859	8.79005e-05	0.00012372	0	0	0.000137287	0		0.000131247	0.000130911	0.00012698	0	0	0	0	0	6.43004e-05	0	0	0.000156311	0	0	0.000134454	6.62778e-05	6.32971e-05	0	0	0	0	0	0	5.54816e-05	0.000145112	0.000157863	0.000139285
FBXO11	-51.15	0.999709	0	0.928973	0	8.91398e-05	0.000270051	0.000103857	0.000115257	0	0	3.83112e-05	0	0.000160746	0.000125727	0.000175801	0	5.83431e-05	0	0.000171609	0		0	0	0	0	0.000144999	0	0	0.000103813	0	0	0	7.81555e-05	0	0	0	9.94168e-05	0.000126594	0	0	0.000193199	0.000141912	0.000112315	8.39913e-05	2.77408e-05	0	6.31453e-05	0
FNTA	-96.35	0.999709	0	0.759711	2.73628e-05	0.000237706	0	0	8.64429e-05	0.000224725	0.000185233	0.000229867	0.000140166	0.000353641	0.000157159	0.000219751	0.00018558	0.000175029	0.000145281	0.000171609	4.18008e-05		0.000131247	3.27279e-05	0.00012698	7.03606e-05	8.69994e-05	0	0.000104734	6.92089e-05	0.000385802	0.000304661	0.000142587	3.90778e-05	0.000147532	0	0	3.31389e-05	0.000411431	0.000340391	0	0.000289799	8.51474e-05	0.000112315	8.39913e-05	5.54816e-05	0.000181389	6.31453e-05	0.000348214
NHSL1	-143.95	0.999709	0	0.00443431	0.000136814	0.000564552	0.000216041	0.000553902	0.000432214	0.000280907	0.000407513	0.000114934	0.000168199	0.000642983	0.000754361	0.00123061	0.000711392	0.000583431	0.00023245	0.000926689	0.00054341		0	0.000261823	9.52351e-05	0	0.000202999	0	0.000314202	0.000138418	0.000257202	6.77025e-05	0	0.000781555	0.000531114	0.000239187	0.000470588	0.000132556	0.000284837	0.000170195	0.000177456	0.000354199	0.000482502	0.000814287	0.000307968	0.000138704	0.00116089	0.000378872	0.000626785
CENPL	-10.25	0.999709	0	0.788944	0	0.000237706	0	0	8.64429e-05	0	0	0.000344801	0	3.21492e-05	9.42951e-05	0.000131851	9.27902e-05	0	8.71688e-05	0.000171609	0.000167203		0.000229681	3.27279e-05	0.000158725	0.000140721	0	0	0.000104734	0	0.000192901	0.000203108	0.00010694	3.90778e-05	0	0.000119593	6.72269e-05	9.94168e-05	0	6.80782e-05	7.09824e-05	0	2.83825e-05	0	0	0	0	6.31453e-05	0
SCN9A	-89.75	0.999709	0	0.065632	5.47256e-05	0.000118853	0.000135026	3.46188e-05	0.0002017	0.000589904	0	0	8.40996e-05	6.42983e-05	0.000282885	0	0.000618601	0.000320887	0.000174338	0.000343218	0		0	0	0	3.51803e-05	8.69994e-05	5.61924e-05	0	0	0	0	0.00010694	0.000156311	0	0.000199322	0.000235294	0	0	0.000102117	0.000141965	0.000289799	0.000198677	5.61577e-05	8.39913e-05	0	3.62779e-05	3.15726e-05	6.96427e-05
RNF144B	-77.7	0.999709	0	1.88851e-34	0.00229847	0.000267419	0.00291655	0.00315032	8.64429e-05	0.00042136	0.000407513	0.00157076	0.00288742	0.000257193	0.0031746	0.00246121	0.000773252	0.00192532	0.00116225	0.00260846	0.00217364		0.000459363	0.000261823	0.00222215	0.000633245	0.00171099	0.000280962	0.000209468	0.00432556	0.000964506	0.00189567	0.000320821	0.00199297	0.00032457	0.000757425	0.000436975	0.000795334	0.000538026	0.00132752	0.000567859	0.00270479	0.000737945	0.00202168	0.000979898	0.000582557	0.000906947	0.00176807	0.000661606
POMGNT1	-104	0.999709	0	4.97141e-08	0.00049253	0	0.000486092	0.00173094	0.000259329	8.4272e-05	0.00033342	0.000498046	0.000308365	0.000417939	0.000157159	0.000131851	0.000247441	0	0.000261506	0.000102965	0		0	6.54557e-05	0	0.000246262	5.79996e-05	2.80962e-05	0.000384025	6.92089e-05	0	0.000169256	0	0.000586166	0.000442595	0	0.00010084	3.31389e-05	0.000126594	0.000340391	0.00106474	3.21999e-05	0.000170295	8.42365e-05	0	0	0	0.000126291	0.000104464
SORBS3	-168.3	0.999709	0	0.0149456	0.000574618	0.000564552	0.000189036	0.000553902	0.000749172	0.000589904	0.000296373	0.000766225	0.000364431	0.000225044	0.000282885	0.000703204	0.00151557	0.000320887	0.000261506	0.000583471	0.000250805		0.00019687	0.000130911	0.00031745	0.000633245	0.000579996	0.000309058	0.000244379	0.000207627	0.000321502	0.000440066	0.00078423	0.000742478	0.00032457	0.000318916	0.000773109	0.00029825	0.000158243	0.000238274	0.000354912	0.000643998	0.00045412	0.000224631	8.39913e-05	0.000194186	0.000145112	6.31453e-05	0.000383035
GGT1	-28.45	0.999709	0	0.802638	8.20883e-05	0.00017828	0	0	0	0.000140453	0.00011114	0	0.000140166	0	0.000220022	0	0.00012372	5.83431e-05	0.000290563	0	0.000167203		0	6.54557e-05	0	0	2.89998e-05	8.42886e-05	0	0	6.43004e-05	0.000169256	0.00010694	0	5.90127e-05	0	0.00010084	0	0.00022154	0.000136156	0	0	0	5.61577e-05	0	0	7.25558e-05	3.15726e-05	0.000104464
CEACAM7	-119	0.999709	0	7.90097e-06	2.73628e-05	0.000534839	0.000378072	0.000103857	0.0004034	0.000168544	0.000148187	0.000191556	0.000504597	0	0.000220022	0.000175801	0.000556741	0.000233372	0.0009298	0.000274574	0		0.000131247	6.54557e-05	0.00038094	3.51803e-05	0.000550996	0	0	0	0.00102881	0.000101554	0	0.000156311	0	0	0.000235294	0.000397667	0	0	0.000532368	0.000515198	0	0	0.000251974	2.77408e-05	0.000435335	0.000189436	0.000174107
DNAJC5B	-117.15	0.999709	0	1.49569e-05	2.73628e-05	0.000297133	0.000162031	0	0.000316957	0.000365179	0	0.000268179	2.80332e-05	6.42983e-05	0.000880088	0.000131851	0.00021651	0.000291715	0	0.000549149	0.000292605		0	9.81836e-05	0.000158725	0.000105541	0	5.61924e-05	0.000174557	0	0.000225051	0.000101554	0.000142587	0.0010551	0	0.000119593	0.000268908	0	9.49457e-05	0	0	0.0001288	5.6765e-05	0.000365025	0.000223977	0.000277408	0	0	0
KIF20A	-56.1	0.999709	0	0.0388676	2.73628e-05	0.000207993	5.40103e-05	0.000138475	0	0.000140453	0	0	0.000168199	0.000160746	0	0	0.00012372	0.000145858	0.000493956	6.86436e-05	0.000167203		0	0.000163639	0.000412685	0	5.79996e-05	8.42886e-05	0	3.46045e-05	0	0	7.12936e-05	0	0	0	0.000235294	0	0.000158243	3.40391e-05	7.09824e-05	0	0.00011353	0.00025271	0	0	0	6.31453e-05	3.48214e-05
RIN1	-38.25	0.999709	0	0.511735	0	0.000237706	0.000162031	0.000346188	0	0	0	0.000459735	0	0.000257193	0.00018859	0.000219751	0.00012372	0	8.71688e-05	3.43218e-05	0		0	0	0	0.000140721	0.000173999	0.000168577	0.000139645	6.92089e-05	0.000192901	0.00027081	0.00010694	0.000156311	8.85191e-05	3.98645e-05	0.000134454	0	0.00022154	0.000306352	3.54912e-05	0	0.00022706	2.80788e-05	0	0	0	0.000126291	0
STK36	-112	0.999709	0	4.69495e-06	0.000164177	0.000653692	0.000513097	0.000484664	0.0004034	0.00042136	0	0.000651291	0.000588697	6.42983e-05	0.000314317	0.000615303	0.0012372	0.00075846	0	0.000720758	0		0	6.54557e-05	0.000222215	0.000281442	0.000173999	0	0.000244379	0.000276836	0.000385802	0	0	0.000937866	0.000177038	3.98645e-05	0	0.000132556	0	0.000953094	0.00110023	0.000289799	0.00022706	0.000758129	0.000111988	0.000194186	0.00068928	0.000536735	0
C15orf39	-40.7	0.999709	0	2.6781e-37	0.000738795	8.91398e-05	0.000891169	0.00141937	0.002017	0.00081463	3.70466e-05	0	0.00173806	0.000578685	0.000220022	0	0.00262906	0.000875146	0.00264412	0.000480505	8.36016e-05		0.000229681	0.000163639	0.00038094	7.03606e-05	0.00266798	0.00238818	0.000174557	0.000346045	0.000225051	3.38513e-05	0.000142587	0.00109418	0.000472102	0.000398645	0.00194958	3.31389e-05	0.00022154	0.0013956	0.00152612	0.000193199	0.0016178	0.000954681	0.000615936	0.000138704	3.62779e-05	0.000157863	0.000487499
AKAP3	-105.8	0.999709	0	0.339743	2.73628e-05	0.000297133	0.000108021	0.000276951	0	8.4272e-05	0.000148187	0	2.80332e-05	9.64475e-05	0.000345749	0.000131851	6.18601e-05	0.000175029	0.000116225	0	0.000209004		6.56233e-05	9.81836e-05	6.349e-05	0.000175901	0	0	3.49113e-05	0	0	0	0	0.000195389	0	0	0.00010084	0	0	0.000170195	0.000106474	0.000225399	0.00011353	8.42365e-05	0	0.000138704	0.000253945	0.000126291	0
IL22RA1	-81	0.999709	0	0.196508	0	0.000267419	8.10154e-05	0.000242332	0	0.000196635	7.40933e-05	0.000191556	0.000168199	0.000192895	0.000314317	0.000175801	0.000247441	2.91715e-05	0	0.000171609	0.000167203		0	0.000163639	0	0.000105541	0.000260998	0	0	0.000242231	0	0	0.000285174	0.000625244	0.000118025	0.000199322	0.000571429	0	0	3.40391e-05	0	0	0.000170295	0.00025271	5.59942e-05	0	3.62779e-05	0.000221008	0.000278571
DFFB	-62.85	0.999709	0	0.593822	0.000136814	2.97133e-05	8.10154e-05	3.46188e-05	0	0.000196635	0	0.000114934	5.60664e-05	0	0.000220022	0	9.27902e-05	0	0.000145281	0.000274574	0.000125402		0	0.000294551	0	0.000105541	0.000202999	0	0	6.92089e-05	9.64506e-05	6.77025e-05	0	0.000195389	0	0.000119593	0.000134454	9.94168e-05	3.16486e-05	0	0	0.000257599	5.6765e-05	8.42365e-05	0	0	0.000145112	0	0
TFAP2C	-31.25	0.999709	0	0.00011159	0	8.91398e-05	0.000216041	0.000553902	0.000144071	0	0	0	8.40996e-05	0	6.28634e-05	8.79005e-05	0.00012372	0.000116686	0.000174338	0	4.18008e-05		0.000360928	0	0	0	0.000144999	8.42886e-05	0	0.000103813	0.000160751	6.77025e-05	0	3.90778e-05	0.00032457	0.000119593	0	0	6.32971e-05	0.000476547	7.09824e-05	0	0	2.80788e-05	0	5.54816e-05	0	0.000252581	0.000174107
PDCD7	-92.75	0.999709	0	0.627715	0	8.91398e-05	5.40103e-05	3.46188e-05	0	0.000224725	7.40933e-05	3.83112e-05	8.40996e-05	0.000128597	0.000282885	0.000263701	0.000340231	0.000175029	5.81125e-05	6.86436e-05	0		0	3.27279e-05	0	0	0.000115999	0.000112385	0	0.000138418	9.64506e-05	0	0.000213881	0.000195389	0	0	0	0.000132556	0.000189891	0.000102117	0	0	8.51474e-05	0.00025271	0	0	7.25558e-05	0.000157863	0
HIST1H3A	-101.9	0.999709	0	0.000407185	0.000875609	0.000207993	8.10154e-05	0.000380807	0.000144071	5.61814e-05	0.00044456	0	0.000532631	9.64475e-05	0.000157159	0.000351602	0.000402091	0.000495916	0	0.000102965	0.000250805		0.000262493	9.81836e-05	0.00038094	7.03606e-05	0.000202999	2.80962e-05	0.000139645	0.000103813	0.000289352	0	7.12936e-05	0.000508011	0.000177038	0.000159458	3.36134e-05	0.000497084	0.00044308	6.80782e-05	3.54912e-05	9.65997e-05	8.51474e-05	8.42365e-05	8.39913e-05	2.77408e-05	0	9.47179e-05	3.48214e-05
ERP27	-91.9	0.999709	0	0.142396	8.20883e-05	5.94265e-05	0	6.92377e-05	0.000259329	0.000196635	0	0.000344801	0	0	3.14317e-05	0.000263701	0	0.000495916	8.71688e-05	6.86436e-05	0.000209004		0	0	6.349e-05	0	0.000173999	0.000309058	0	3.46045e-05	3.21502e-05	3.38513e-05	7.12936e-05	0	0	0.000199322	0.00010084	3.31389e-05	0	0.000102117	0.000319421	0	0	0	2.79971e-05	0	0	0	0.000139285
FOSL1	-104.6	0.999709	0	7.74353e-09	0.000410442	0	0.000108021	6.92377e-05	0.000172886	0	0.000185233	0.000229867	0.000476564	6.42983e-05	6.28634e-05	0	6.18601e-05	0.000175029	0.00136564	0	0		9.84349e-05	0	0	3.51803e-05	0.000289998	0.000252866	0	0	3.21502e-05	0	0	7.81555e-05	0.000147532	0	0	0	0.000379783	0	0	0.0001288	0.00011353	0	0	0	0	0	0
RGN	-57.9	0.999709	0	0.0695381	0.000191539	5.94265e-05	0	6.92377e-05	0	0.000196635	7.40933e-05	0	0	0	0.000408612	0	0.000402091	0.000262544	0	0.000411862	0.000125402		0.00019687	9.81836e-05	0	3.51803e-05	0	0	0.000453847	0.000207627	3.21502e-05	0.000101554	3.56468e-05	0	2.95064e-05	0.000159458	0.000201681	0	0	0.000102117	7.09824e-05	6.43998e-05	0	0.000393104	0	0.000110963	0	0.000284154	0.000174107
NR2C1	-192.55	0.999709	0	0.0705438	0.00079352	0.000475412	0.000918174	0.000380807	0.000662729	0.00084272	0.00044456	0.00091947	0.000336398	0.000160746	0.00091152	0.000791104	0.000773252	0.000729288	0.0004649	0.00075508	0.000501609		0.000656233	0.000360007	0.00031745	0.000562885	0.000173999	0.000196673	0.000349113	0.000276836	0.000514403	0.000203108	0.000748583	0.0010551	0.000177038	0.000239187	0.000302521	0.000497084	0.00101275	0.000238274	0.000354912	0.000193199	0.00022706	0.000786208	2.79971e-05	0.000138704	0.000471613	0.000568307	0.000696427
PWWP2B	-101.1	0.999709	0	0.891568	0.000136814	0.000356559	5.40103e-05	0.000138475	0	5.61814e-05	0.000185233	0	0.000140166	6.42983e-05	0	0.000131851	0	0.000145858	2.90563e-05	6.86436e-05	0.000167203		0.00019687	0	6.349e-05	0	0	0	0	0.000103813	0.000257202	0.000101554	0.00010694	0	2.95064e-05	0	3.36134e-05	6.62778e-05	3.16486e-05	0	0.000106474	9.65997e-05	0.000255442	2.80788e-05	2.79971e-05	0	3.62779e-05	0.000126291	6.96427e-05
MED22	-71.3	0.999709	0	0.711537	0	0	8.10154e-05	0.000103857	0	0	7.40933e-05	3.83112e-05	0	9.64475e-05	0	0.000175801	9.27902e-05	0.000204201	5.81125e-05	6.86436e-05	0.000125402		0	0	0	0	0	0	0	3.46045e-05	0	3.38513e-05	3.56468e-05	3.90778e-05	0	0.000279051	6.72269e-05	0.000198834	9.49457e-05	3.40391e-05	0	3.21999e-05	2.83825e-05	0.000112315	0	0	7.25558e-05	3.15726e-05	0.000139285
FANCB	-49.45	0.999709	0	0.761975	0.000328353	0.000148566	0.000189036	0.000138475	0	8.4272e-05	3.70466e-05	0	0	0	6.28634e-05	0	0.000340231	0.000116686	0.000174338	3.43218e-05	0.000250805		0	0	3.1745e-05	3.51803e-05	8.69994e-05	0.000112385	3.49113e-05	0.000138418	0	0.000169256	0	0	0	0	0.000201681	0.000231972	3.16486e-05	0.000204234	0	0	0	0.000168473	0	0	3.62779e-05	0.000189436	0.000139285
MRAS	-102.65	0.999709	0	0.336552	0.000410442	8.91398e-05	0.000297056	6.92377e-05	0.000432214	0.000365179	0	0.000153245	0.000168199	0	0.000251454	0	0.000371161	0	0.000145281	0.000205931	0		0.000131247	0	0.000222215	0	0.000144999	2.80962e-05	6.98227e-05	3.46045e-05	0	0	0.000142587	0	0.000118025	0.000239187	0.000168067	0	0	0.000204234	3.54912e-05	0	0	0.000336946	8.39913e-05	0.000110963	7.25558e-05	0.000157863	0
DCN	-80.4	0.999709	0	0.0939146	0	0.000118853	2.70051e-05	0.000103857	0.000115257	0	7.40933e-05	0	5.60664e-05	0	0.000220022	0.000527403	3.09301e-05	0.000175029	0	0.000343218	8.36016e-05		6.56233e-05	0	0	0.000105541	0	0	0	0.000207627	0	0	0	0.000234467	0.000118025	0	3.36134e-05	6.62778e-05	0.000158243	3.40391e-05	0	0	0	0.000196552	0	0	0	9.47179e-05	0
KLHL13	-42	0.999709	0	0.078846	0	8.91398e-05	0	0	0	5.61814e-05	7.40933e-05	0.000153245	0	0.000225044	3.14317e-05	0.000219751	0.00015465	0.000466744	0	0.000205931	0.000167203		0	0	0	0	0	0	0	0	0	0	0	0	0.000295064	0.000239187	3.36134e-05	6.62778e-05	0	6.80782e-05	0	3.21999e-05	5.6765e-05	0.00025271	0	0.000388371	0.000253945	0.000157863	0.000313392
CBWD2	-105.35	0.999709	0	0.467201	5.47256e-05	5.94265e-05	0.000135026	0.000207713	0.000374586	0.000112363	3.70466e-05	0.000114934	5.60664e-05	0	0.000157159	0.000263701	0.000247441	0.000204201	8.71688e-05	0.000171609	0.000167203		6.56233e-05	0	3.1745e-05	0	5.79996e-05	0.000393347	0.000104734	0	6.43004e-05	6.77025e-05	0.000178234	0.000468933	0	0	0.000336134	3.31389e-05	0	3.40391e-05	0.000177456	0	0.000255442	8.42365e-05	0	5.54816e-05	0.000217667	0	3.48214e-05
PLA2G6	-125.05	0.999709	0	0.800548	0.000218902	0.000207993	8.10154e-05	0.000276951	0.000316957	2.80907e-05	0.00011114	0	0.000252299	0.000192895	0.000377181	8.79005e-05	0.00018558	0.000145858	0	0.000240253	0.000250805		0.000164058	0.000229095	3.1745e-05	3.51803e-05	8.69994e-05	0.000112385	0.000174557	0	0.000128601	0	0	0.000156311	2.95064e-05	0.000199322	0.000168067	9.94168e-05	0	6.80782e-05	0.000425894	9.65997e-05	5.6765e-05	0.000280788	0.000111988	0.00036063	0.000217667	0	0.000139285
CHI3L2	-72.1	0.999709	0	3.61442e-08	0.000383079	0	8.10154e-05	0.000103857	0.0004034	0.000561814	0.00022228	0.000383112	0.000112133	0	0	0	0.00012372	0.000175029	0.000784519	0	0		0	0	9.52351e-05	0.000140721	8.69994e-05	5.61924e-05	0	0.000242231	0.000707305	0.000101554	0	0.0003517	0.000206545	0	0	0.000132556	0	0	0.000141965	0	8.51474e-05	0.000112315	0	0.000610297	0.000544168	0.000378872	0
MTRF1	-121.95	0.999709	0	0.603939	0.000191539	0.000356559	0.000432082	0	2.88143e-05	8.4272e-05	0.000481606	0.00030649	0.000504597	0	0.000408612	8.79005e-05	0.000340231	0.000262544	0	0.00037754	0.000459809		0.000164058	0.000163639	9.52351e-05	7.03606e-05	0.000115999	2.80962e-05	6.98227e-05	0.000276836	9.64506e-05	0	0.000142587	7.81555e-05	0.00032457	0.000159458	0.00010084	6.62778e-05	0.000158243	0	0	0.0001288	0.000170295	0.00025271	0.000139985	0.000221926	0.000290223	0	0.00024375
CRTAP	-104.7	0.999709	0	0.963229	0.000437804	0	0.000135026	0.000276951	0.000374586	0.000308997	0.000259326	0.000153245	0.000196232	0	0.000440044	0.000395552	0.000371161	5.83431e-05	0.000261506	3.43218e-05	8.36016e-05		3.28116e-05	9.81836e-05	6.349e-05	0.000457344	0.000115999	0.000393347	0.000209468	0.000242231	0.000417953	6.77025e-05	0.000320821	0.000195389	5.90127e-05	0.000119593	0.000470588	0.000364528	0.00022154	0.000442508	0	0.000225399	0.000170295	0.000365025	8.39913e-05	0.000221926	0.000108834	6.31453e-05	0.000139285
EXOC2	-90.6	0.999709	0	0.511613	0.000246265	2.97133e-05	0.000297056	0.000346188	0	2.80907e-05	0.000481606	0.000536357	0.000336398	6.42983e-05	0.000251454	0	0.000433021	0.000291715	2.90563e-05	0.000274574	0.000167203		0.000131247	3.27279e-05	0.00044443	0.000140721	0.000173999	0.000112385	0.000139645	6.92089e-05	9.64506e-05	0	7.12936e-05	0.000117233	0.000206545	7.97289e-05	0	0.000165695	0.000158243	0	0.000141965	0.000289799	0.00011353	5.61577e-05	0	0.000194186	7.25558e-05	0.000157863	0.000174107
RBL2	-32.7	0.999709	0	0.873281	5.47256e-05	0.000118853	0	0	8.64429e-05	0.000140453	0.000148187	3.83112e-05	5.60664e-05	6.42983e-05	9.42951e-05	0	0.00015465	8.75146e-05	0	0.000137287	8.36016e-05		0.000131247	6.54557e-05	0.000158725	0.000105541	0	0.000280962	3.49113e-05	0.000103813	0	0	0.000285174	0.000234467	0	0.000159458	0	0	0.000253189	0.000204234	0.000106474	0	2.83825e-05	0.000224631	0	0.000194186	0.000181389	0.000315726	0.000104464
LRRC20	-139.95	0.999709	0	0.0773296	0.000437804	8.91398e-05	8.10154e-05	0.000796233	0.000230514	8.4272e-05	0.000296373	3.83112e-05	0	0.000353641	0.000125727	0.000395552	0.000494881	0.000233372	0	0.00037754	0.000125402		0	9.81836e-05	0.000222215	0	8.69994e-05	0	0.000104734	6.92089e-05	0	0	0.000178234	0.000273544	0.000206545	0	0	0.000231972	3.16486e-05	0.000102117	0.000141965	0	2.83825e-05	0.000196552	0.000139985	0	0.000217667	0	3.48214e-05
RASL11A	-138.25	0.999709	0	1.80995e-11	0.00172385	0.000713118	0.000189036	0.00058852	0.000345772	0.000449451	0	0.00061298	0.000504597	6.42983e-05	0.000314317	0.00136246	0.00021651	0.000670945	0.000145281	0.00037754	0.000376207		3.28116e-05	0	0.000158725	7.03606e-05	0.000260998	0	0	0.000242231	0.000225051	0	0.000499055	0.00109418	0.000442595	0.00135539	0.00147899	0.000132556	0.00022154	6.80782e-05	0.000390403	6.43998e-05	0.00011353	0.000926602	0.000111988	0.000166445	0	0.000347299	0.000696427
PUS1	-80.25	0.999709	0	0.706872	0.000191539	0	0	6.92377e-05	0.000115257	0	0	0.000191556	8.40996e-05	0	0.000125727	0.000131851	9.27902e-05	0	2.90563e-05	0	8.36016e-05		0	9.81836e-05	0	0	2.89998e-05	0	0	0	3.21502e-05	3.38513e-05	0	3.90778e-05	0	0	3.36134e-05	3.31389e-05	3.16486e-05	3.40391e-05	0	0.000289799	8.51474e-05	0	0	0	0.000145112	3.15726e-05	6.96427e-05
KDM4D	-214.75	0.906625	0	0.558644	0.000109451	0.000594265	0.000486092	0.000484664	0.000115257	0.000252816	0.000296373	0.000229867	0.000280332	0.000225044	0.00018859	0.000439502	0.000340231	0.000320887	0.000290563	0.000343218	0.000250805		3.28116e-05	6.54557e-05	0.00012698	0.000105541	0.000173999	0.000196673	6.98227e-05	0.000519067	0.000160751	0.000236959	0.00010694	0.000117233	0.000177038	0.000398645	3.36134e-05	0.000165695	0.000411431	0.000442508	0	0.000160999	0.000141912	0.000449262	8.39913e-05	0.000249667	0.000290223	9.47179e-05	0.000417856
RNF135	-161.65	0.999709	0	0.387663	0.000300991	0.00017828	0.000486092	0.000761615	0.000547472	0.000252816	0.000370466	0.000383112	0.000308365	3.21492e-05	0.000785793	0.000747154	0.000402091	0.000262544	0.000145281	0.000446183	0.000501609		0.000492174	0.000294551	0.000349195	0.000457344	0.000144999	0.000196673	6.98227e-05	0.000415254	0.000385802	0.000135405	0.000320821	0.000898789	0.000118025	0.000398645	0.000705882	0.000497084	0.000854512	0.000272313	0.000106474	0.000708398	0.000312207	0.000645813	5.59942e-05	0.000332889	0.000145112	0	0.000452678
FRMD4B	-123.1	0.999709	0	0.545886	5.47256e-05	0.000118853	0.000189036	0	0.000144071	0.000196635	7.40933e-05	0.000114934	5.60664e-05	0.00038579	6.28634e-05	0.000483453	0	0.000145858	0.000116225	0.000205931	0		9.84349e-05	9.81836e-05	0	0.000211082	0	0.000140481	6.98227e-05	0	0	6.77025e-05	7.12936e-05	3.90778e-05	0	0.000279051	0.00010084	0.000198834	0	0	0.000106474	0	0	8.42365e-05	0	5.54816e-05	0.000145112	0	0
MANEA	-45.65	0.999709	0	0.648609	8.20883e-05	2.97133e-05	0	0.000207713	0.000144071	0	0.000148187	0.000153245	2.80332e-05	0	0.000282885	8.79005e-05	0.00018558	0.000116686	0.000116225	0.000137287	0		0	3.27279e-05	0.00012698	0.000140721	0.000144999	0.000365251	0	0.000415254	0.000225051	0	3.56468e-05	0	0.000147532	0.000199322	0	0	9.49457e-05	3.40391e-05	3.54912e-05	0	8.51474e-05	0.000140394	8.39913e-05	0.000166445	3.62779e-05	0.000473589	0
IKZF3	-141	0.999709	0	0.0212576	0.000574618	0.000297133	0.000405077	0.00058852	0.000633914	0.000786539	0.000370466	0.000459735	0	0.000128597	0.000754361	4.39502e-05	0.000402091	5.83431e-05	0.000639238	0.000549149	0.000167203		0	0.000130911	3.1745e-05	0.000175901	0	0.000505732	0.000349113	0.000173022	0.000932356	0.000101554	0.00078423	0.000156311	5.90127e-05	0	0.000168067	6.62778e-05	0.000411431	0.000136156	0.000496877	0.000450799	0	0.000336946	0	0.000249667	0.000798114	0.000378872	0.000139285
EFCAB7	-87.05	0.999709	0	0.689441	0	5.94265e-05	5.40103e-05	0.000276951	0.000374586	0.000140453	7.40933e-05	0.000114934	8.40996e-05	0	0.000251454	4.39502e-05	0.00015465	8.75146e-05	0	6.86436e-05	8.36016e-05		0	0	0	0.000105541	8.69994e-05	8.42886e-05	6.98227e-05	0	0.000128601	0	0.000249528	0.000234467	0	0	3.36134e-05	0	0	0.000408469	0.000106474	0	0	0	0.000167983	0.000166445	3.62779e-05	3.15726e-05	3.48214e-05
CNTNAP3B	-58.55	0.999709	0	0.401278	0.000191539	0.000148566	2.70051e-05	0	0	0	0.000185233	0.000229867	5.60664e-05	9.64475e-05	0.000220022	0.000439502	0.00018558	8.75146e-05	0	0.000171609	0.000167203		9.84349e-05	0.000327279	6.349e-05	0.000140721	0	2.80962e-05	0.000174557	0	0.000225051	0	0.000142587	0.000156311	5.90127e-05	0	0	9.94168e-05	9.49457e-05	0.000170195	0	6.43998e-05	0.000255442	0.000140394	0	0	0.000290223	0	0.000313392
XCL2	-36.15	0.999709	0	2.05973e-22	0	0	0.000108021	0.000207713	0.000576286	2.80907e-05	7.40933e-05	0.000344801	0.000840996	6.42983e-05	0.00018859	0	0.000463951	0.000233372	0.00124942	0.000171609	0		9.84349e-05	0	6.349e-05	0.000316623	0.000550996	0.000196673	0.000104734	0.000103813	0.000932356	0	0	0.000312622	2.95064e-05	0	0.000168067	0.000331389	0	0	0.000532368	9.65997e-05	0	0	0	0.000471593	0.00203156	0.000252581	0
PAQR8	-45.1	0.999709	0	0.201003	2.73628e-05	8.91398e-05	0	0.000103857	0.000172886	2.80907e-05	0.000259326	3.83112e-05	0.000196232	3.21492e-05	0	0.000307652	0.00018558	0	0	0.000102965	0.000125402		0	0	0	7.03606e-05	5.79996e-05	0	0	0	9.64506e-05	0	0.00010694	7.81555e-05	2.95064e-05	3.98645e-05	0.000470588	0.000231972	0.000126594	0.000306352	0	6.43998e-05	0	0.000280788	0	2.77408e-05	0.000181389	3.15726e-05	3.48214e-05
NCKIPSD	-139.2	0.999709	0	0.138231	0.000164177	0.00017828	0.000135026	0.000380807	0.000374586	0.000477542	0	0.000114934	8.40996e-05	0	0.00018859	0.000219751	0.000247441	0.000116686	0.000755463	0.000411862	0.000167203		9.84349e-05	3.27279e-05	6.349e-05	0.000105541	0.000202999	8.42886e-05	3.49113e-05	0	0	0.000338513	0	0.000429855	2.95064e-05	0	0.000369748	0.000165695	0.000316486	0.000408469	3.54912e-05	3.21999e-05	2.83825e-05	5.61577e-05	0	0.000138704	0	6.31453e-05	0.00024375
PTPRN2	-25.8	0.999709	0	0.646855	5.47256e-05	0.000237706	0	0.000242332	2.88143e-05	0.000140453	0	0	8.40996e-05	0.000128597	9.42951e-05	0.000307652	9.27902e-05	0.000145858	0	0	4.18008e-05		3.28116e-05	3.27279e-05	0.000158725	3.51803e-05	0	5.61924e-05	0	0	0.000353652	0.000135405	0.000178234	0.000312622	5.90127e-05	0.000199322	0.000168067	0	9.49457e-05	6.80782e-05	3.54912e-05	0.000257599	0.00011353	0.000336946	0	0.000166445	3.62779e-05	0	0
ETNK2	-7.7	0.999709	0	0.616543	0.000109451	0	8.10154e-05	0.000276951	0.000144071	0	0	0	8.40996e-05	0	0.000314317	0	0	0.000320887	0	0.000102965	0.000167203		6.56233e-05	0	3.1745e-05	0.000105541	2.89998e-05	0	3.49113e-05	0.000103813	0.000160751	0.000101554	0	7.81555e-05	0	0.000159458	0.000134454	0.000231972	0.000126594	0	0.000141965	0.000225399	0.000255442	0	0.000139985	5.54816e-05	0	0.000157863	3.48214e-05
L3HYPDH	-151.95	0.999709	0	0.286981	0.000136814	0.000118853	0.000162031	6.92377e-05	0.000345772	0.000112363	7.40933e-05	0	8.40996e-05	0.000225044	0.000440044	0.000571353	0.00012372	0.000175029	0.000203394	0.000240253	0.000585211		0.00019687	6.54557e-05	0.00012698	0.000175901	0	5.61924e-05	6.98227e-05	0.000276836	6.43004e-05	0	0.00010694	0	0	0	0.000235294	0.000331389	3.16486e-05	0	0	6.43998e-05	0.000141912	2.80788e-05	2.79971e-05	5.54816e-05	0.000326501	0.000315726	6.96427e-05
MCMBP	-59.2	0.999709	0	0.0356683	8.20883e-05	0.000207993	0.000297056	0.000103857	0.000345772	0	0	0	2.80332e-05	0	0	4.39502e-05	0.00018558	8.75146e-05	0.000145281	0	8.36016e-05		0	6.54557e-05	6.349e-05	3.51803e-05	0	8.42886e-05	0.000139645	0.000103813	3.21502e-05	0	0	7.81555e-05	5.90127e-05	0	0.000134454	3.31389e-05	0	0.000136156	0.000638842	0.0001288	0	0	8.39913e-05	0.000110963	0.000217667	9.47179e-05	0
SCMH1	-66.5	0.999709	0	0.519901	2.73628e-05	0.000237706	0.000135026	0	0.000230514	0.000168544	0	0	8.40996e-05	0.000128597	0.00018859	0	6.18601e-05	5.83431e-05	2.90563e-05	0.000102965	0.000250805		3.28116e-05	0	0	0.000175901	0.000115999	0.00022477	0	0.000138418	0	6.77025e-05	0	0.000273544	0	0.000318916	0.00010084	0	0	0.000170195	0.000354912	0	8.51474e-05	0	0.000139985	0	0	0	0
ATHL1	-52.8	0.999709	0	0.528387	8.20883e-05	0.000207993	0.000270051	0	0	0	0	0	5.60664e-05	9.64475e-05	9.42951e-05	0	0.00021651	0.000320887	0.000145281	0.000205931	8.36016e-05		0.000295305	0.000261823	0	0.000105541	5.79996e-05	5.61924e-05	0	0	3.21502e-05	0	3.56468e-05	0	5.90127e-05	0.000159458	0.000134454	0	0	0	0	0	8.51474e-05	0.000168473	0	0	0.000290223	0.000505162	0.000139285
ZNF687	-98.1	0.999709	0	0.0134663	0.000218902	0	8.10154e-05	0.000623139	0.0002017	0.000196635	0	0.000153245	0.000252299	0	3.14317e-05	0.000219751	0.000463951	5.83431e-05	0	0.000480505	4.18008e-05		0	6.54557e-05	0	0	0.000376997	0.000168577	0	6.92089e-05	0	0.000304661	0.000213881	0.000156311	0.000531114	0	0.00010084	9.94168e-05	0.000126594	0.000136156	0.000212947	9.65997e-05	0.000624415	0.000168473	0	0	0	0.000126291	0.000104464
ZBTB16	-13.45	0.999709	0	0.000138166	0	0	0.000108021	0	0	0	0.00022228	0	0.000336398	0.00038579	0.000471476	0.000175801	0	0	8.71688e-05	0.000171609	0.000167203		3.28116e-05	0	0	0	0.000202999	8.42886e-05	0	0.000242231	0	0	0	0	0	3.98645e-05	0.000403361	0.000629639	0.000284837	0.000136156	0	0.000193199	0	0.000365025	8.39913e-05	5.54816e-05	0	0	0
PRKAB2	-31.75	0.999709	0	0.746504	0	0.000148566	0	0	0.000144071	0	0.000148187	0.000153245	0.000364431	0	9.42951e-05	4.39502e-05	0.000433021	0.000116686	0	0.000137287	0		0.000164058	0.000130911	0	3.51803e-05	5.79996e-05	0	0.000104734	3.46045e-05	0.000128601	0.000236959	0	3.90778e-05	0.000118025	0.000159458	3.36134e-05	3.31389e-05	3.16486e-05	0	0	0	0	0.000168473	5.59942e-05	0	0.000108834	0	0.000208928
ZMYM2	-80.65	0.999709	0	0.865618	0.000191539	5.94265e-05	0.000270051	0.000138475	2.88143e-05	0.000168544	0	0	0	0.000289343	6.28634e-05	0.000175801	0.00015465	0.000233372	0	0.000240253	0.000167203		6.56233e-05	0	0.000222215	3.51803e-05	2.89998e-05	8.42886e-05	0.000279291	6.92089e-05	0.000128601	0.000101554	0	0.000117233	0	3.98645e-05	3.36134e-05	0.000165695	9.49457e-05	0	0	0.000257599	0.000198677	0	0	0	0	0.000126291	0
TRERF1	-95.55	0.999709	0	0.695389	8.20883e-05	0.000118853	0.000243046	0.000173094	0	0.000196635	3.70466e-05	0	0.000196232	0	0.000220022	0	0.00018558	0.000145858	2.90563e-05	0	4.18008e-05		0	9.81836e-05	0	0	0.000115999	0	0	0	0.000128601	3.38513e-05	3.56468e-05	3.90778e-05	0	0.000159458	0.00010084	0	6.32971e-05	0	0	0.0001288	0	0.000224631	0	0	3.62779e-05	6.31453e-05	3.48214e-05
TMX4	-58	0.999709	0	0.887662	0.000218902	5.94265e-05	2.70051e-05	0.000207713	8.64429e-05	8.4272e-05	0.00022228	0.000153245	2.80332e-05	3.21492e-05	0.000125727	8.79005e-05	6.18601e-05	5.83431e-05	2.90563e-05	0	0.000167203		0.00039374	3.27279e-05	0	3.51803e-05	0	0	0	0.000103813	6.43004e-05	3.38513e-05	0	0.000273544	2.95064e-05	0.000199322	0.00010084	0.000165695	0.00022154	0.000306352	3.54912e-05	0	2.83825e-05	0.000140394	0	0.000221926	0.000181389	0	0
CHAF1A	-43.7	0.999709	0	0.250683	0.000328353	0	8.10154e-05	0.000207713	0	0.000196635	0.000148187	7.66225e-05	0.000280332	0	0	0	0.00015465	0.000145858	0.000203394	0	4.18008e-05		0	0.000392734	0	0.000246262	2.89998e-05	5.61924e-05	0.000174557	0	6.43004e-05	6.77025e-05	0.000356468	0.000195389	0	0	0.000168067	0	3.16486e-05	3.40391e-05	0	0	0	5.61577e-05	0	2.77408e-05	0.000399057	0.000315726	0
RPUSD1	-101.45	0.999709	0	0.64147	0.000328353	0.000237706	0.000270051	0.000346188	0.000144071	0.000280907	7.40933e-05	0.000268179	2.80332e-05	9.64475e-05	0.000502907	0.000307652	3.09301e-05	0	5.81125e-05	0	0		3.28116e-05	0	0.00025396	0	8.69994e-05	0.000168577	3.49113e-05	3.46045e-05	0.000257202	0.000135405	0	0.000312622	0.000265557	7.97289e-05	0.000336134	0.000265111	0.000316486	0.000204234	0	0	0.000141912	0.000449262	2.79971e-05	0.000249667	3.62779e-05	0.000189436	0
DHRS2	-41.2	0.999709	0	0.468418	0.000109451	0	0.000162031	0	5.76286e-05	0	0.000185233	0	0.000280332	0	0.00018859	0.000219751	0.00012372	0	8.71688e-05	0	8.36016e-05		0	0	0.00012698	0	0.000144999	2.80962e-05	0	0	0	3.38513e-05	3.56468e-05	0	0.000118025	0.000159458	0.000504202	0	9.49457e-05	0	0.000106474	0	0	0	0.000167983	0	0.000253945	0.000126291	6.96427e-05
ADRA2A	-57.35	0.999709	0	0.0932179	5.47256e-05	0.000148566	2.70051e-05	0	0.000316957	0.000337088	0.00011114	7.66225e-05	0	6.42983e-05	0.000282885	0	0.000278371	8.75146e-05	0	0.000137287	4.18008e-05		0.000262493	0.000327279	0	0	0	0	0	0.000103813	0	0.000406215	0.000142587	0	0	7.97289e-05	6.72269e-05	0.000198834	3.16486e-05	6.80782e-05	0.00028393	0.0001288	0.00011353	0	2.79971e-05	0	0.000290223	0	0.00024375
KIFC1	-70.5	0.999709	0	0.977619	5.47256e-05	0.000118853	0	0	0.000115257	0.000140453	0	7.66225e-05	0.000224266	9.64475e-05	6.28634e-05	8.79005e-05	0.00012372	0	0	0	8.36016e-05		3.28116e-05	0	0	0	0	0	0.000104734	0	0.000128601	3.38513e-05	7.12936e-05	0	0	0	0.00010084	3.31389e-05	0	0.000170195	0	0.000160999	0	2.80788e-05	0	0	0	0.000126291	3.48214e-05
TRIP13	-36.3	0.999709	0	0.0108389	0.000574618	0.000148566	0.000108021	0.000103857	0	8.4272e-05	0.000518653	0.000114934	0.000336398	0	0	0	0	0.000204201	8.71688e-05	0	8.36016e-05		0	9.81836e-05	0.000349195	0	0.000144999	0.000196673	0	6.92089e-05	0.000192901	0	0.000249528	3.90778e-05	0	0	0	3.31389e-05	0.000126594	0.000170195	0.000177456	0	2.83825e-05	0	0	0	3.62779e-05	0	3.48214e-05
CLUL1	-82.95	0.999709	0	0.000734096	0.000109451	0	0.000162031	0	0	0	3.70466e-05	7.66225e-05	0.000168199	9.64475e-05	0.000660066	0.000483453	0.000433021	0.000145858	0	0.000411862	8.36016e-05		0.000131247	0.000163639	0	0.000246262	8.69994e-05	0	0	0	0	0	0	0	0	7.97289e-05	0	3.31389e-05	0.000284837	3.40391e-05	0.000106474	0	5.6765e-05	5.61577e-05	0	0	0	6.31453e-05	0.00024375
RHOBTB2	-89.65	0.999709	0	0.0336702	0	8.91398e-05	0.000162031	0.000519283	0.000432214	0.000365179	0.00022228	0.000421424	2.80332e-05	0	0	0	0.000525811	0.000233372	0	0.000102965	0.000209004		0	0	6.349e-05	0.000140721	0.000376997	0	0	6.92089e-05	0	0.000135405	0	0.000195389	8.85191e-05	3.98645e-05	6.72269e-05	0.000198834	0	0.000340391	3.54912e-05	3.21999e-05	0.000170295	8.42365e-05	5.59942e-05	0	3.62779e-05	0.000221008	0.000313392
RNF11	-14.45	0.999709	0	0.793552	0	0	8.10154e-05	0.000173094	0	0	0.000185233	0.000114934	0	0.000128597	0.000125727	4.39502e-05	9.27902e-05	0	0	0.000102965	0.000167203		0	0	6.349e-05	0.000175901	8.69994e-05	0	0	0	3.21502e-05	0	0.000249528	0	0.000147532	0.000119593	3.36134e-05	9.94168e-05	0.000158243	0	0	0.000289799	0	8.42365e-05	0	5.54816e-05	0.000108834	3.15726e-05	0
TBC1D16	-57.8	0.999709	0	0.850868	0.000136814	2.97133e-05	0	0.000103857	8.64429e-05	8.4272e-05	0.000259326	0	0	3.21492e-05	0.000125727	8.79005e-05	0	0.000233372	5.81125e-05	0.000171609	4.18008e-05		0.000262493	0	3.1745e-05	0.000105541	2.89998e-05	0	3.49113e-05	0.000103813	0.000225051	0.000101554	0.000178234	0.000117233	0	7.97289e-05	3.36134e-05	0.000132556	9.49457e-05	0.00037443	3.54912e-05	3.21999e-05	0.000283825	5.61577e-05	0	5.54816e-05	0	3.15726e-05	0.000104464
PIK3R4	-34.9	0.999709	0	0.835077	8.20883e-05	0.000118853	0	0.000173094	0	2.80907e-05	0.00011114	0	8.40996e-05	9.64475e-05	0	0	3.09301e-05	0	0.000174338	0.000205931	8.36016e-05		6.56233e-05	0	0	0.000140721	5.79996e-05	0	0	0	6.43004e-05	3.38513e-05	0.00010694	0	0	3.98645e-05	3.36134e-05	3.31389e-05	0.00022154	0.000136156	7.09824e-05	0	8.51474e-05	0.000112315	0	0	0	0.000252581	0
CYP11A1	-103.8	0.999709	0	0.0720717	0.000273628	0.000148566	0.000108021	0.000380807	0	0	0.000148187	0.000153245	0.000252299	0	0.000157159	0	0.00018558	0.000262544	0	0.000858045	0		3.28116e-05	9.81836e-05	0	3.51803e-05	0	0	0.000139645	0.000138418	6.43004e-05	3.38513e-05	7.12936e-05	0.000312622	0	3.98645e-05	0.000134454	6.62778e-05	0.000158243	3.40391e-05	0	0.0001288	8.51474e-05	0.000140394	0	0.000110963	3.62779e-05	0.000189436	0
BAHD1	-58.4	0.999709	0	0.707903	0.000164177	0	8.10154e-05	0	0.000230514	0	3.70466e-05	0	0	0	0.000157159	0.000175801	3.09301e-05	8.75146e-05	0.000290563	6.86436e-05	8.36016e-05		3.28116e-05	0	0	0	0	2.80962e-05	0	0.000103813	0.000257202	6.77025e-05	0	0.000234467	2.95064e-05	0	0.000235294	3.31389e-05	0.000189891	0	0	3.21999e-05	0	0	0	0	0	0	0
CTCF	-28.6	0.999709	0	0.0369633	8.20883e-05	8.91398e-05	0	0	2.88143e-05	0.000112363	0	0.000191556	0	0.000257193	9.42951e-05	0.000439502	3.09301e-05	8.75146e-05	0	0.000205931	0.000125402		0.000328116	0	0	3.51803e-05	0.000231998	0.000140481	0	0	0	0	0.000463409	3.90778e-05	0.000206545	0.000239187	0.000168067	0	0.00044308	0	0.000177456	0	0.000141912	0.000449262	2.79971e-05	0	0	0	0
KIF3B	-113.1	0.999709	0	0.466177	5.47256e-05	0	0.000324062	0.000138475	0.000230514	0.000280907	3.70466e-05	0.000229867	0.000224266	0.000128597	0.000157159	0.000263701	0.00018558	0.000175029	2.90563e-05	0	0.000250805		0.00039374	9.81836e-05	6.349e-05	0.000175901	2.89998e-05	2.80962e-05	0.000139645	6.92089e-05	0.000192901	3.38513e-05	0.000178234	0.000156311	0.000295064	0.000199322	0.000235294	0.000165695	3.16486e-05	6.80782e-05	0.000106474	0	0.000141912	0.000224631	0	0.000110963	0	6.31453e-05	6.96427e-05
CYP24A1	-107.35	0.999709	0	4.89528e-09	0.000273628	0.000267419	0	0.000207713	0.000461029	0.000112363	0.00044456	0.000268179	0.000112133	0	0.00018859	0	0.000711392	0.000175029	0.000290563	3.43218e-05	8.36016e-05		0	0.000130911	0	0	0.000144999	2.80962e-05	0.000209468	0.000242231	0.00151106	3.38513e-05	0.00010694	0.000156311	0	0	0.000134454	0	0	0.000612703	0	3.21999e-05	0	0.000336946	0	0	0	0	0.000208928
CERS3	-56.6	0.999709	0	0.898873	0.000109451	0.000148566	8.10154e-05	0.00031157	0	0	0	0.000153245	0	0	0	8.79005e-05	3.09301e-05	0.000233372	8.71688e-05	0	0.000125402		0	0	9.52351e-05	0	0.000202999	0.000168577	0	6.92089e-05	9.64506e-05	6.77025e-05	0	7.81555e-05	0	0	0	0	6.32971e-05	0	0	9.65997e-05	0	0.000140394	0	2.77408e-05	0	0	6.96427e-05
SLCO4A1	-53.95	0.999709	0	0.130663	0	5.94265e-05	0.000135026	0.000242332	8.64429e-05	0.000112363	0.00011114	0	5.60664e-05	0	6.28634e-05	8.79005e-05	0.00012372	8.75146e-05	0.000435844	6.86436e-05	4.18008e-05		0	0	0.00012698	3.51803e-05	0.000318998	0.000252866	0	3.46045e-05	0.000321502	0.000203108	0.00010694	0	0.000177038	7.97289e-05	3.36134e-05	0.000165695	0	0	0	0.0001288	0	0	0	0.000221926	3.62779e-05	0.000157863	0
POU2F1	-118.5	0.999709	0	0.351654	0.000300991	0.00017828	0.000324062	0.000207713	0.000259329	0.000224725	0.00022228	3.83112e-05	8.40996e-05	0	0.00113154	0.000351602	0.000309301	0.000262544	8.71688e-05	6.86436e-05	8.36016e-05		0.00019687	6.54557e-05	0.000158725	0.000598065	0.000347998	8.42886e-05	6.98227e-05	0.000207627	0.000257202	3.38513e-05	0.000392115	0.0003517	0.000118025	7.97289e-05	0.000235294	0.000331389	0.00044308	0.000340391	0.000106474	3.21999e-05	0.000170295	0.00025271	5.59942e-05	0.000332889	7.25558e-05	0.000126291	6.96427e-05
LOC653602	-39.8	0.999709	0	0.194912	0	0	0.000189036	0.000138475	8.64429e-05	0.000140453	7.40933e-05	0.000229867	0.000140166	0	9.42951e-05	0.000703204	0	0.000233372	0.000145281	0	0.000167203		0.000131247	0.000261823	0.00019047	0	0	5.61924e-05	0	0.000207627	0.000160751	0	0.000249528	0.000234467	0	0.000159458	0.000336134	0.000132556	0	0.000238274	0.000177456	6.43998e-05	0	0	8.39913e-05	8.32224e-05	0	0.000189436	0.000383035
CPNE1	-88.55	0.999709	0	0.707602	8.20883e-05	8.91398e-05	0	0.000242332	0.000230514	0.000365179	0.000185233	3.83112e-05	0.000224266	0.000257193	0.000282885	8.79005e-05	9.27902e-05	0.000175029	0	0.000343218	4.18008e-05		0.000164058	0.000261823	0.00038094	7.03606e-05	0.000144999	0.000140481	3.49113e-05	0.000173022	6.43004e-05	3.38513e-05	0	0.000117233	5.90127e-05	3.98645e-05	6.72269e-05	0.000132556	9.49457e-05	0	7.09824e-05	0	0.000312207	2.80788e-05	2.79971e-05	0.00036063	0.000181389	0.000410444	0
CCP110	-105.95	0.999709	0	0.00260232	0.000246265	0	0.000567108	0.000276951	0.000720357	2.80907e-05	0.00033342	7.66225e-05	0.000196232	0.000128597	3.14317e-05	0.000175801	0.000958832	0	0.000174338	0.000137287	0.000167203		3.28116e-05	0	3.1745e-05	7.03606e-05	0	0	0	6.92089e-05	0.000257202	0	0.000213881	3.90778e-05	0.000206545	0	6.72269e-05	0.000165695	6.32971e-05	0.000136156	0.000496877	9.65997e-05	0.000283825	0.000505419	2.79971e-05	5.54816e-05	3.62779e-05	0.000126291	0
SPRY2	-71.55	0.999709	0	0.907975	0	0.000118853	5.40103e-05	3.46188e-05	2.88143e-05	0	0.00022228	0.000153245	8.40996e-05	0.000128597	3.14317e-05	0	0.00012372	0.000116686	0.000145281	0	0.000167203		6.56233e-05	3.27279e-05	0.00012698	0	0	0.000112385	0	0.000242231	0	3.38513e-05	0	3.90778e-05	0	0	0	9.94168e-05	9.49457e-05	3.40391e-05	0.000177456	0	2.83825e-05	0	0	0.000138704	3.62779e-05	0.000189436	0.000104464
OCLN	-142.3	0.999709	0	0.0910317	0.000629344	0.000950825	0.000108021	0.000173094	0.000374586	0.000168544	0.000592746	7.66225e-05	0.000336398	0.000257193	0.000440044	0.000483453	0.000556741	0.000262544	0.000435844	0.000652114	0.000418008		0	0.000556374	0.00012698	0.000140721	0.000144999	2.80962e-05	0	3.46045e-05	0.000546553	0.000135405	0.000178234	0.0003517	0.000118025	0.000119593	0.000168067	3.31389e-05	6.32971e-05	0.000136156	0.000177456	0.000257599	5.6765e-05	0.000393104	2.79971e-05	5.54816e-05	0.00050789	0.000157863	0.000313392
SF3B3	-154.2	0.999709	0	0.222059	0.000109451	0.000475412	0.000270051	0.000242332	0.000461029	0.000252816	0.00011114	3.83112e-05	0.000196232	6.42983e-05	0.000471476	0.000175801	0.000371161	0.000350058	0	0.000240253	8.36016e-05		0	3.27279e-05	0.000158725	0.000105541	0	0	6.98227e-05	6.92089e-05	0.000450103	0.000338513	0.000213881	0.000468933	8.85191e-05	0.000159458	0	0.000165695	0.000253189	6.80782e-05	0.000106474	9.65997e-05	0.000170295	0.00025271	0	0.000776742	0.000181389	3.15726e-05	0.000383035
FCGR3B	-4.7	0.999709	0	1.39728e-294	0.000629344	0.000831971	0.00116122	0.000692377	0.000777986	5.61814e-05	0	0.000727914	0.00294349	0	3.14317e-05	0.000879005	0.00015465	5.83431e-05	0.00183054	0	0.000627012		0	0.00271641	0.00038094	7.03606e-05	0.00197199	0.0176725	0	0.00062288	0.00337577	0.000203108	0.00245963	0.000195389	0.00159334	0.000677696	0.000168067	0.000265111	6.32971e-05	0.00142964	3.54912e-05	0	0.00130559	5.61577e-05	0.000335965	0.000221926	0.000362779	0.000189436	0
FAM229A	-37.35	0.999709	0	0.702973	0.000191539	8.91398e-05	8.10154e-05	6.92377e-05	0	8.4272e-05	0	0	0	0.000160746	0.000282885	0	0	8.75146e-05	0.000203394	3.43218e-05	4.18008e-05		9.84349e-05	3.27279e-05	0.00012698	0	8.69994e-05	0	0	6.92089e-05	0	0	0	0.000195389	0.000354076	0	6.72269e-05	0.00029825	3.16486e-05	6.80782e-05	0.000212947	0.000160999	0	0.000280788	0	2.77408e-05	0	0.000221008	0
CRISPLD1	-137.7	0.999709	0	0.508696	0	2.97133e-05	2.70051e-05	6.92377e-05	0.0002017	8.4272e-05	0.000370466	0.000344801	0.000168199	0.000160746	0.000125727	0.000307652	0.00012372	0.00037923	0.000116225	0.000240253	0.000418008		0.000164058	0	0.000476175	0	2.89998e-05	8.42886e-05	0	3.46045e-05	6.43004e-05	0	0.000249528	0.000273544	5.90127e-05	0	0.000134454	0.000265111	0.000189891	0	0	3.21999e-05	8.51474e-05	0.000140394	0.000223977	0	0.000108834	0.000221008	0.00024375
C19orf24	-54.2	0.999709	0	0.67957	0.00049253	0	0	0.000380807	2.88143e-05	0.000140453	0.00022228	0.000344801	2.80332e-05	0.000257193	0.000314317	0.000175801	0	0	0.000319619	0	4.18008e-05		0.000492174	6.54557e-05	0.00044443	0.000351803	5.79996e-05	0.000168577	0.000104734	0.000173022	0.000160751	0.000507769	0	0.000273544	0.00032457	0.000159458	0.000168067	0.000397667	0	0.000170195	0.000141965	9.65997e-05	0.000255442	0.000561577	5.59942e-05	0.000277408	3.62779e-05	0	0
MSRA	-56.4	0.999709	0	0.366399	8.20883e-05	8.91398e-05	0.000243046	0	0.000172886	0	0.000185233	0	2.80332e-05	0	9.42951e-05	0.000307652	0.00012372	5.83431e-05	5.81125e-05	0.000205931	0.000209004		3.28116e-05	3.27279e-05	3.1745e-05	0.000105541	0	0.000112385	0	0	0.000225051	6.77025e-05	0	0.000312622	0	0	3.36134e-05	0	0.000189891	3.40391e-05	3.54912e-05	0	0	0.000196552	0	0.000277408	3.62779e-05	9.47179e-05	0
MTNR1A	-88.55	0.999709	0	3.7355e-05	0.000410442	0.000623979	5.40103e-05	0.000276951	0.000345772	0.000337088	0.000370466	3.83112e-05	0	0	0.000345749	8.79005e-05	0.00021651	0.000145858	0	6.86436e-05	0.000167203		6.56233e-05	0	0.00019047	0.000105541	0	0.000112385	0	3.46045e-05	0.000707305	0.000744728	0.000463409	0	2.95064e-05	0	0.000201681	6.62778e-05	0.000126594	0	0	0.000257599	0	8.42365e-05	0	2.77408e-05	0.000653002	6.31453e-05	0.000383035
CSF2RB	-16.8	0.999709	0	3.90499e-08	0.000136814	0	8.10154e-05	0	0.0002017	0.000112363	0	0.000153245	0.000448531	9.64475e-05	6.28634e-05	8.79005e-05	0	0.000116686	0.00110414	0	0		0	0	3.1745e-05	0	0.000173999	0.00126433	0	3.46045e-05	0.000482253	0.000203108	0.000285174	0.000234467	0.000472102	0.000318916	0.000168067	0	0	0.000238274	0.000177456	0	0.000255442	0	0	5.54816e-05	0	0	3.48214e-05
VEPH1	-43	0.999709	0	0.705865	0	0.000118853	5.40103e-05	0	0	2.80907e-05	0.000185233	0.000114934	0	0.000257193	0.000220022	0.000175801	0.00018558	0	0	0.000102965	0.000125402		0.000229681	0	0	0.000351803	0.000115999	8.42886e-05	0	6.92089e-05	0	0	0.00010694	3.90778e-05	0	0	6.72269e-05	0.000165695	0	6.80782e-05	0	9.65997e-05	0.000141912	0.000196552	8.39913e-05	0	3.62779e-05	0	0
TRIM31	-104.45	0.999709	0	7.15956e-45	0.00224375	0.00347645	0.00132325	0.000761615	0.00155597	0.000533723	0.000518653	0.000153245	0.000196232	0	0.000440044	4.39502e-05	0.000927902	0.000408401	0.00203394	0.000514827	0.000501609		0.000557798	0.000130911	0.0022539	0.000562885	0	8.42886e-05	0.000139645	0	0.000514403	0.000203108	0.00235269	0	2.95064e-05	3.98645e-05	0.000705882	0.00109358	0	3.40391e-05	0.000177456	0.0001288	0.000198677	0.000421183	0.000279971	5.54816e-05	0.00119717	0.000252581	0
ALDH1B1	-93.4	0.999709	0	0.154604	0.000547256	0.000415986	0.000243046	0.000276951	0	2.80907e-05	0	3.83112e-05	0.000392465	6.42983e-05	0.000251454	0	0.000433021	0.000350058	8.71688e-05	0.000446183	0.000459809		0.000262493	9.81836e-05	6.349e-05	0.000105541	0	0	0.000384025	0	0.000160751	3.38513e-05	3.56468e-05	0.000195389	8.85191e-05	0	0.000134454	0.000198834	0.000316486	3.40391e-05	0	0.000257599	0.000198677	0.000280788	2.79971e-05	0.000332889	7.25558e-05	3.15726e-05	0.000174107
BEST3	-58.75	0.999709	0	0.0835206	0.000164177	0.000118853	0	3.46188e-05	0	0	0	0.000114934	8.40996e-05	0.000160746	3.14317e-05	0.000439502	0.00012372	0.000145858	0	0.000102965	4.18008e-05		0.000164058	3.27279e-05	0.000222215	0	0	0	0	6.92089e-05	0	0	0	0.000156311	8.85191e-05	0.000438509	0	0	0	0.000204234	3.54912e-05	3.21999e-05	0	0	0	5.54816e-05	0	0	0.000452678
TUBB3	-142.8	0.999709	0	2.8383e-10	0.000273628	0.000594265	0.000108021	0	0.00103731	0.000758448	3.70466e-05	0.000153245	2.80332e-05	0.000289343	3.14317e-05	0	0.00120627	0.0014294	0.000987913	0.000308896	0.000167203		3.28116e-05	0.000130911	0.000158725	3.51803e-05	0.000202999	8.42886e-05	0.000174557	0	0.000643004	0.000338513	0.000142587	0.000195389	8.85191e-05	0	0.000268908	0.000165695	0	0.000102117	0.000106474	6.43998e-05	0.00022706	5.61577e-05	0	2.77408e-05	0	0.000284154	6.96427e-05
DFNB59	-145.3	0.999709	0	0.325031	0.000136814	8.91398e-05	8.10154e-05	0.000138475	0.0002017	8.4272e-05	0.000148187	0.000229867	0.000420498	0.000257193	0.000565771	0.000351602	0.000340231	0.000525088	0	0	0.000250805		0.000328116	0.000163639	0	0	0.000231998	0	0.000314202	0.000276836	0	0	0.000178234	7.81555e-05	0.000177038	0	3.36134e-05	0.000165695	0.000253189	3.40391e-05	0	0	2.83825e-05	5.61577e-05	2.79971e-05	2.77408e-05	3.62779e-05	9.47179e-05	0.000174107
DEXI	-84.5	0.999709	0	0.983135	2.73628e-05	0.000118853	0.000162031	0	8.64429e-05	8.4272e-05	3.70466e-05	0.000114934	8.40996e-05	9.64475e-05	9.42951e-05	0	0.00021651	0	0	0.000102965	0.000125402		9.84349e-05	3.27279e-05	6.349e-05	0	2.89998e-05	0	0	3.46045e-05	0.000192901	0	0.000178234	3.90778e-05	5.90127e-05	0	0.000168067	0	0	0	0	0	2.83825e-05	0.000112315	0	0	0	0.000126291	0
IFITM10	-90.25	0.999709	0	0.93464	8.20883e-05	0.000118853	0.000297056	0.000173094	0.000115257	0.000168544	0	0	0	3.21492e-05	0.000220022	0.000307652	3.09301e-05	0	0	0.000102965	4.18008e-05		6.56233e-05	0	3.1745e-05	0.000140721	0.000115999	0.000112385	0.000279291	0.000346045	6.43004e-05	0	3.56468e-05	0	0	0	0.000134454	3.31389e-05	0.000158243	0.000136156	0	0.0001288	5.6765e-05	0.000112315	0.000111988	0	0	0	0
ZNF606	-42	0.999709	0	0.00575263	8.20883e-05	2.97133e-05	0.000270051	0.000103857	8.64429e-05	0.000168544	0	0.000114934	2.80332e-05	0	0.000282885	0	3.09301e-05	0.000116686	0	0	0.000794215		0	0	3.1745e-05	0.000211082	0	2.80962e-05	0.000139645	0.00031144	0.000192901	0	0.000142587	0	2.95064e-05	0.000637831	0.000134454	6.62778e-05	0	0	0	3.21999e-05	0	2.80788e-05	0	8.32224e-05	0	3.15726e-05	0
KIAA1033	-88.9	0.999709	0	0.725229	0.000109451	2.97133e-05	8.10154e-05	0	0.000172886	0	0.000185233	0.000383112	0	0.000128597	0	8.79005e-05	0	8.75146e-05	0.000145281	0	8.36016e-05		0	3.27279e-05	9.52351e-05	0	0.000173999	0	0	0.000103813	0	6.77025e-05	7.12936e-05	0	0	0.000318916	3.36134e-05	3.31389e-05	0	0	0	3.21999e-05	5.6765e-05	0	0	0.000110963	0.000145112	0	3.48214e-05
CTSK	-169.75	0.999709	0	0.01944	0.000109451	0.000445699	0.000216041	0.000103857	0.000172886	0.000168544	0.000407513	0.000114934	0.000252299	6.42983e-05	0.000220022	0.000395552	0.000556741	0.000495916	0.000145281	0.000686436	0.000376207		0.000164058	0.000130911	0.000158725	0	0	8.42886e-05	0.000244379	3.46045e-05	0.000160751	0	0	0.000195389	0	0.000159458	6.72269e-05	0.000231972	0.000759566	0.000102117	7.09824e-05	3.21999e-05	0	0	8.39913e-05	5.54816e-05	3.62779e-05	0.000473589	0.000139285
SOCS3	-48	0.999709	0	9.07593e-09	0	0.000118853	0.000216041	0.000173094	0.000288143	0	0	3.83112e-05	0.000840996	0	0	8.79005e-05	6.18601e-05	0.000175029	0.000174338	0.000102965	0		0	0.000294551	0.00012698	0	0.000115999	0.00081479	0	0.000138418	0.000707305	0.000169256	0.000320821	0	0.000118025	0	3.36134e-05	0	9.49457e-05	0	0	0	0	0	0	0	7.25558e-05	9.47179e-05	0
TMPRSS11A	-47.05	0.999709	0	0.000193099	0.000218902	0.000237706	8.10154e-05	0.000346188	0.0002017	0	7.40933e-05	0.000268179	0.000756896	0	0.000220022	0.000659254	0	0.000233372	0.00023245	0.000240253	0		0	0	0.00044443	0.000140721	0.000231998	0.000477635	6.98227e-05	0.000276836	0.000868056	3.38513e-05	0.000392115	0	0	3.98645e-05	0	0	0	6.80782e-05	3.54912e-05	0	0.000255442	0.000421183	8.39913e-05	0	0.000108834	0.000126291	3.48214e-05
ZNF823	-39.3	0.999709	0	0.530917	0	8.91398e-05	0.000135026	0	0.0002017	0	0	3.83112e-05	0.000280332	6.42983e-05	0.000157159	0.000131851	0	0.000116686	0.000145281	0	0.000209004		0.000164058	3.27279e-05	3.1745e-05	0.000281442	0.000260998	0	0	6.92089e-05	3.21502e-05	3.38513e-05	0.000142587	3.90778e-05	0	0	0	3.31389e-05	0	0.000102117	0.000212947	9.65997e-05	0	0.000112315	0	8.32224e-05	0	0	6.96427e-05
RNA_SPIKE_ERCC-00085	-98.9	0.999709	0	0.647183	0.000191539	0	2.70051e-05	0	8.64429e-05	0.000280907	7.40933e-05	0	0.000280332	0	6.28634e-05	0.000263701	0.00012372	0.000175029	0.000145281	6.86436e-05	0		0	9.81836e-05	0.00012698	0.000386983	0	2.80962e-05	0	0.000138418	3.21502e-05	0	0	0	0.000147532	0	0	0.000231972	0.000158243	0.000102117	0	3.21999e-05	0	0.000140394	2.79971e-05	0.000194186	0	0	0
PDE1A	-69.4	0.999709	0	0.0692133	2.73628e-05	0	0	0.000207713	8.64429e-05	2.80907e-05	0	3.83112e-05	5.60664e-05	9.64475e-05	0.00018859	0.000615303	0.00021651	0.000175029	0	0.000308896	8.36016e-05		0.000131247	0	0	0.000140721	2.89998e-05	0	0.000139645	0.000242231	0	0	0	0.000117233	0	0	0.00010084	0.000165695	0.000189891	0	0.000106474	0	0.000198677	0.000336946	0	0	0	3.15726e-05	0
CGNL1	-61.25	0.999709	0	0.918706	8.20883e-05	8.91398e-05	0	0.000103857	0	8.4272e-05	0	0	8.40996e-05	9.64475e-05	0.000125727	8.79005e-05	9.27902e-05	0	0	0.000205931	0		9.84349e-05	0	3.1745e-05	7.03606e-05	8.69994e-05	0	0	0	3.21502e-05	3.38513e-05	0	7.81555e-05	0.000295064	0.000119593	0	0.000165695	9.49457e-05	0	0.000141965	0.0001288	0	0.000168473	0	8.32224e-05	0	0	3.48214e-05
CLDN8	-84.8	0.999709	0	0.939906	0.000136814	5.94265e-05	2.70051e-05	0.000103857	0	5.61814e-05	0	0.000114934	0.000112133	0	0.00018859	0.000307652	0.00015465	8.75146e-05	0	0.000102965	0		0.000131247	3.27279e-05	0	0.000246262	5.79996e-05	0	0	0	0	0	0.000142587	0.000195389	0.000118025	3.98645e-05	0.000268908	0	0	6.80782e-05	0.000106474	0	0.000170295	2.80788e-05	0	0	7.25558e-05	0	3.48214e-05
ATP2B1	-91.85	0.999709	0	0.554527	0	2.97133e-05	8.10154e-05	0.000173094	0.000115257	2.80907e-05	0.000148187	0.000344801	0.000364431	0.000160746	0	0	9.27902e-05	0	0.000116225	6.86436e-05	0.000250805		0	0	0.00025396	0.000246262	0	0.000393347	0.000139645	0.000103813	0.000128601	0	3.56468e-05	0.000156311	2.95064e-05	0.000119593	0	0.000265111	0	0.000204234	0	0.000160999	2.83825e-05	8.42365e-05	0.000139985	0	0	0	0
IFNG	-72	0.999709	0	4.86883e-07	0	0.000297133	0.000189036	6.92377e-05	0.000432214	0.000252816	7.40933e-05	0	0.000196232	9.64475e-05	0.000220022	0	0	0.000116686	0.000523013	6.86436e-05	0		6.56233e-05	6.54557e-05	0.000158725	0.000281442	0.000144999	0	0	0.000173022	0.000610854	0	0.000499055	0.000312622	0	0	3.36134e-05	6.62778e-05	3.16486e-05	0.000136156	0.000177456	0	0	0.000196552	0	0.000138704	0.00119717	0.000157863	3.48214e-05
NOVA1	-98.15	0.999709	0	0.296651	2.73628e-05	8.91398e-05	5.40103e-05	0	2.88143e-05	0.000505632	0.00011114	0.000153245	0	9.64475e-05	0.000314317	0.000175801	0.000278371	0.000233372	0	0	0.000167203		3.28116e-05	0	0	0	2.89998e-05	0	6.98227e-05	0.000173022	0	0	0	0.000117233	0.000236051	0.000199322	0	0	0	0	0	6.43998e-05	0	0.000196552	0.000111988	5.54816e-05	0.000108834	6.31453e-05	0.000104464
S1PR2	-110.2	0.999709	0	0.0817929	2.73628e-05	0.00017828	0	0	0.000576286	0.000140453	0.00033342	0.000153245	0.000252299	0	0.000157159	0	0.000278371	5.83431e-05	0.000290563	0.000205931	0		0	6.54557e-05	0	0	2.89998e-05	5.61924e-05	0	6.92089e-05	0.000321502	0	0.000249528	0	5.90127e-05	0	6.72269e-05	9.94168e-05	6.32971e-05	0	0.000567859	9.65997e-05	5.6765e-05	0.000112315	0.000335965	0	0.000181389	0.000157863	6.96427e-05
DPY19L3	-143.3	0.999709	0	0.0236725	8.20883e-05	8.91398e-05	2.70051e-05	6.92377e-05	0.000749172	2.80907e-05	0.000148187	0	5.60664e-05	0.000128597	0.000220022	0.000439502	0.00012372	8.75146e-05	2.90563e-05	0.000137287	0.000125402		0.000131247	0	0	0	8.69994e-05	0	3.49113e-05	0	6.43004e-05	0	0	0	8.85191e-05	0	0	0	0.000158243	6.80782e-05	0	0	0	0.00025271	8.39913e-05	0.000110963	0.000145112	0	6.96427e-05
MSL1	-73.25	0.999709	0	0.859506	0.000191539	8.91398e-05	0	0	0.000144071	8.4272e-05	0.000148187	0.000191556	0	0.000160746	9.42951e-05	0	6.18601e-05	5.83431e-05	0.000145281	0.000205931	0		0.00019687	9.81836e-05	9.52351e-05	0	0.000202999	0.000112385	0	0	0.000128601	6.77025e-05	0	0	0	0.000159458	0	0	9.49457e-05	0	7.09824e-05	0	0	0	5.59942e-05	0	3.62779e-05	0.000189436	0.000139285
SLC14A1	-197.9	0.999709	0	3.45772e-26	0.000218902	0.000267419	0.000405077	0	0.0010085	0.000955083	0.000407513	0	0.000168199	0.00199325	0.000817225	0.000791104	0.0038044	0.00183781	0	0.00137287	0.000334406		9.84349e-05	0.000229095	0	0.000140721	0	0	0.000279291	0	6.43004e-05	0	0.000213881	0.000586166	8.85191e-05	0.000279051	0	0.000132556	9.49457e-05	0.000238274	0	0.0001288	0.00034059	0.000336946	0.000223977	0	7.25558e-05	0.000126291	0.00024375
HIST1H4H	-105.95	0.999709	0	0.0449968	0.000136814	0.000267419	5.40103e-05	3.46188e-05	0.000172886	0.000477542	0.000296373	0.000191556	0.000140166	0	0	0.000175801	0.00018558	0.000233372	0.000552069	0.000102965	0.000125402		0	3.27279e-05	0.00025396	7.03606e-05	0.000231998	0.000168577	0	0	0	0	0	0	0.000265557	0	3.36134e-05	0	0	0	0.000567859	0.0001288	5.6765e-05	2.80788e-05	0	0.000221926	0.000217667	0.000284154	3.48214e-05
NLRP14	-88.2	0.999709	0	0.122623	8.20883e-05	8.91398e-05	0.000108021	0	5.76286e-05	0.000393269	7.40933e-05	0.000229867	0	6.42983e-05	0.000220022	0	0.000402091	0	0	0.000137287	0.000167203		0	0	3.1745e-05	7.03606e-05	0	0	0.000209468	0	0	0	0.000178234	3.90778e-05	0	0.000199322	0.00010084	0	0.000126594	0	0	9.65997e-05	5.6765e-05	0.000224631	0	0.000332889	0.000145112	0	0.000278571
ZCWPW2	-50.2	0.999709	0	0.558847	0.000109451	8.91398e-05	0	0.000173094	0	0	0	7.66225e-05	5.60664e-05	9.64475e-05	0.000157159	0.000131851	0	8.75146e-05	0	0.00037754	0		0	9.81836e-05	0.00019047	0.000316623	5.79996e-05	0	0	0	0.000128601	3.38513e-05	7.12936e-05	0	0.000118025	0	6.72269e-05	0	0	0	0	9.65997e-05	0.000170295	2.80788e-05	0	5.54816e-05	0.000362779	0	0.000174107
TMEM117	-37.4	0.999709	0	0.623916	0	0	2.70051e-05	0.000207713	0.000115257	8.4272e-05	0	0	0.000168199	0.000128597	0.000125727	0.000395552	3.09301e-05	0.000204201	0.000116225	0	0		0	0	9.52351e-05	0.000175901	8.69994e-05	0.00022477	0	0	0.000289352	3.38513e-05	0.000178234	0.000117233	0.000177038	0.000159458	6.72269e-05	0	0	0.000306352	3.54912e-05	0	0.00022706	0	0	0	7.25558e-05	0	0
E2F4	-117.8	0.999709	0	0.636398	0.000136814	2.97133e-05	8.10154e-05	0.000138475	0.0002017	2.80907e-05	3.70466e-05	0	0.000112133	3.21492e-05	0.000251454	0.000219751	0.000371161	2.91715e-05	0.000290563	3.43218e-05	0.000167203		0	3.27279e-05	0.000349195	0.000105541	2.89998e-05	0	0	0	6.43004e-05	3.38513e-05	0	0.000156311	0	0.000279051	0	0	0	0	3.54912e-05	0.000160999	0	0.000196552	0	5.54816e-05	7.25558e-05	6.31453e-05	0
PRKACB	-178.85	0.999709	0	0.0312207	0.000300991	0.000386272	0.000162031	0.000276951	0.000288143	2.80907e-05	0.00066684	0.000766225	0.000364431	0.000321492	0.000251454	0.000131851	0.00021651	0.000291715	8.71688e-05	0.000171609	0		0	3.27279e-05	9.52351e-05	0	5.79996e-05	0	3.49113e-05	0.000242231	0.000128601	0.000101554	0.000463409	0.0003517	0	7.97289e-05	0	3.31389e-05	0.00044308	0	0.000212947	0.0001288	2.83825e-05	0.000112315	2.79971e-05	0.000166445	0.000326501	0.000157863	0
ZNF324B	-83	0.999709	0	0.313155	0.000191539	0	0.000135026	0	0	0.000196635	0	3.83112e-05	0.000112133	0.000128597	3.14317e-05	0.000219751	0.000278371	2.91715e-05	8.71688e-05	0	0.000209004		9.84349e-05	3.27279e-05	0	0.000386983	0	2.80962e-05	0.000104734	0.000207627	0	0	0	0	0	0.000398645	0.00010084	3.31389e-05	9.49457e-05	0.000136156	0.000390403	0	0	0	0	0	0	3.15726e-05	3.48214e-05
LTA	-72.8	0.999709	0	0.302979	2.73628e-05	0.000207993	0.000270051	0.000276951	0.000489843	0	0.00033342	0	2.80332e-05	9.64475e-05	0.00018859	0	6.18601e-05	0	0.000203394	0.000137287	0		3.28116e-05	0.000163639	0.000222215	0.000175901	0.000144999	0.000280962	3.49113e-05	3.46045e-05	0	0	0.000320821	0	0	0	0	0	9.49457e-05	0	0.000177456	0	5.6765e-05	0	2.79971e-05	0.000388371	0.000399057	0	3.48214e-05
CD244	-21.65	0.999709	0	0.129511	0	0.000118853	0.000108021	0	0.0002017	5.61814e-05	0	0.000153245	0.000168199	0	0	0	0.00012372	0.000145858	0.00023245	0.000274574	0		0	6.54557e-05	0.00012698	0.000246262	2.89998e-05	0	0	3.46045e-05	0	0	0.000249528	3.90778e-05	0	0	0	0	6.32971e-05	0	0	0	0	0	0	0.000388371	0.000326501	0	0
MAFG	-62.95	0.999709	0	0.964021	0	5.94265e-05	2.70051e-05	0.000103857	0	8.4272e-05	0.000148187	0	0.000112133	0	0.000125727	0.000263701	0.00015465	8.75146e-05	0	0	0.000167203		0	6.54557e-05	0.00012698	0.000175901	0	2.80962e-05	0	0.000173022	0.000225051	3.38513e-05	0.000213881	0	0	3.98645e-05	0.000235294	0.000265111	0.000126594	6.80782e-05	0.000106474	0	0.000170295	0.000140394	0	2.77408e-05	7.25558e-05	0	3.48214e-05
CACNB1	-100.75	0.999709	0	0.719442	0	0.000237706	5.40103e-05	0.000242332	0	0.000196635	7.40933e-05	0	0.000112133	0	9.42951e-05	0.000131851	0.000463951	0.000175029	5.81125e-05	0.000137287	0		0	0	0	0	0	5.61924e-05	3.49113e-05	0	6.43004e-05	0.000169256	0.000213881	0.000273544	0	0.000119593	0	3.31389e-05	0.00022154	3.40391e-05	0	3.21999e-05	5.6765e-05	5.61577e-05	0.000139985	8.32224e-05	7.25558e-05	0	0.000139285
CLDN19	-91.85	0.999709	0	2.15035e-06	0	5.94265e-05	8.10154e-05	3.46188e-05	0.000115257	8.4272e-05	0	0	0.000280332	0	0.000785793	0.000219751	0.000680461	0.000437573	0	0.000514827	0		0.000426551	3.27279e-05	0	0	2.89998e-05	0	0.000174557	0	0	0	0	0.000156311	0	0.000119593	3.36134e-05	6.62778e-05	0	0.000136156	0	0	0	2.80788e-05	5.59942e-05	0	0.000108834	0	0
CSF3	-125.35	0.999709	0	0	0.00290045	0.00546724	0.000243046	0.00090009	0.00576286	0.00132026	0.000518653	0.000191556	0.000672797	3.21492e-05	0.000502907	0.000175801	0.00423742	0.00285881	0.000813575	0.000514827	0		0	0.00101456	0.00019047	0	0.000115999	0.000140481	0	0.00031144	0.0437886	0.00389289	0.000570349	0.000117233	8.85191e-05	0.000239187	0.000571429	0.000695917	0.000126594	6.80782e-05	0.00088728	0.0014168	0.000170295	2.80788e-05	0.000223977	0.00133156	0.00210412	0.000315726	0.000905356
C9orf43	-50.25	0.999709	0	0.527882	0	0.000267419	0.000243046	0	0.000144071	0	3.70466e-05	0.000114934	0	6.42983e-05	0.000125727	0.000131851	0.000494881	2.91715e-05	0	0.000205931	0.000334406		3.28116e-05	6.54557e-05	0	0.000175901	0	0	0	6.92089e-05	9.64506e-05	0	0	0.000156311	0	0	0	9.94168e-05	0.000126594	0.000102117	0	0.000160999	0	0.000224631	0	0.000138704	0.000145112	0.000284154	0.000174107
KDM1A	-86.2	0.999709	0	0.679636	0.000218902	0.000237706	0	0.000276951	0	0	0.000296373	0.000114934	0.000168199	9.64475e-05	0.000440044	8.79005e-05	0.00015465	0	0	0.000137287	8.36016e-05		9.84349e-05	0	0	0	2.89998e-05	0.000112385	6.98227e-05	0.000138418	0.000385802	0.000135405	0.000285174	3.90778e-05	0	7.97289e-05	0.000201681	3.31389e-05	0.000348134	0	0.00028393	9.65997e-05	0.000141912	0.000140394	0.000167983	8.32224e-05	0.000108834	3.15726e-05	0
ZFP2	-86.9	0.999709	0	0.997308	0.000191539	0.000118853	0.000189036	0.000207713	0.000115257	0	0.00011114	0	0.000140166	9.64475e-05	9.42951e-05	8.79005e-05	0	8.75146e-05	0	0	0.000125402		0.000164058	0	0	0.000105541	0	0	0.000104734	0	6.43004e-05	0	3.56468e-05	0.000195389	2.95064e-05	0	3.36134e-05	6.62778e-05	0.000126594	0.000136156	0	0.0001288	0	2.80788e-05	0	0	0	0.000157863	6.96427e-05
OSCAR	-125.55	0.999709	0	5.51181e-08	0.000355716	0.000148566	0.000459087	0.000173094	0.000374586	0.00042136	0	0.000191556	0.000392465	0	0	0.000131851	3.09301e-05	0.000233372	0.00101697	0.000102965	0		6.56233e-05	0.000261823	0.000158725	0	0.000289998	0.00129243	3.49113e-05	0.000103813	0.000128601	0.000135405	0.000142587	0	0	0	0	0.000132556	0	0	0.000106474	0	0.00011353	0.000112315	0.00019598	0.000277408	0.000145112	6.31453e-05	0.000139285
CLDN23	-60.75	0.999709	0	0.0606033	0.000136814	0	0.000162031	0	0.000115257	8.4272e-05	3.70466e-05	7.66225e-05	8.40996e-05	0.000192895	0.000125727	0	9.27902e-05	0	0.000261506	0	0		0	0	0.000222215	0	2.89998e-05	0	0	0.000173022	0	0	0.000392115	0	0.000118025	3.98645e-05	6.72269e-05	3.31389e-05	9.49457e-05	0	0	0.0001288	0	0	2.79971e-05	0	3.62779e-05	9.47179e-05	0.000557142
CDK19	-40.85	0.999709	0	0.582085	0.000109451	0	0.000135026	0.000103857	0	0	0.000185233	0.000114934	5.60664e-05	6.42983e-05	9.42951e-05	0	0.00012372	0	0.000377731	0.000137287	0.000167203		0	0	0.000285705	0.000140721	0.000144999	0.000252866	0.000174557	0	9.64506e-05	0	3.56468e-05	3.90778e-05	0	0	0	0.00029825	3.16486e-05	3.40391e-05	0.000141965	0.0001288	0.000170295	8.42365e-05	0.000223977	0.000110963	0	0.000126291	0
FOXO1	-84.6	0.999709	0	0.237483	5.47256e-05	0.000118853	0.000135026	0.000415426	0	0	7.40933e-05	0.000114934	0.000308365	6.42983e-05	0.000377181	0	0.00015465	0.000233372	0	0.000102965	0		0	0	0	0	2.89998e-05	0	0.000104734	6.92089e-05	0.000289352	0	0	0	0.000236051	7.97289e-05	0.000235294	0.000331389	0.000126594	3.40391e-05	0	6.43998e-05	0.000198677	0.00025271	5.59942e-05	2.77408e-05	0	9.47179e-05	3.48214e-05
MEIS1	-92.75	0.999709	0	0.565722	2.73628e-05	0.000237706	0.000135026	0.000103857	0.000115257	0.000168544	0.00011114	0.000191556	0.000112133	3.21492e-05	9.42951e-05	0	6.18601e-05	0.000262544	0	0	0.000125402		0	3.27279e-05	0	0	0	5.61924e-05	0	0	0.000417953	0	3.56468e-05	7.81555e-05	0.000147532	0	6.72269e-05	0.000132556	0.000158243	0.000408469	0	3.21999e-05	0.00011353	0.000168473	0	0	0.000290223	9.47179e-05	6.96427e-05
VHL	-98.5	0.999709	0	0.954006	0.000109451	0.000297133	0.000135026	6.92377e-05	8.64429e-05	0.000140453	0.000148187	0.000153245	0	0	0.000125727	0	0.00015465	0	0	0.000171609	0.000292605		0	0.000130911	0	0	0	2.80962e-05	0	0.000138418	9.64506e-05	0	7.12936e-05	0.000117233	5.90127e-05	7.97289e-05	0	0.000132556	0.000126594	0.000204234	3.54912e-05	6.43998e-05	0	0.000112315	8.39913e-05	0.000166445	0.000145112	3.15726e-05	0.000104464
TTC19	-116.55	0.999709	0	0.69788	8.20883e-05	0.000118853	0.000162031	0.000276951	0.000288143	0.000112363	3.70466e-05	0	0.000112133	0	0.000157159	0.000131851	3.09301e-05	0.000175029	8.71688e-05	0	8.36016e-05		0.000131247	9.81836e-05	9.52351e-05	0	8.69994e-05	5.61924e-05	0	0	0	0	0	3.90778e-05	0	0	0	3.31389e-05	9.49457e-05	6.80782e-05	3.54912e-05	0	0	8.42365e-05	0.000139985	0	3.62779e-05	0.000157863	0.000104464
PTPN4	-7.15	0.999709	0	0.696345	0	0	0.000135026	0	0.000115257	0.000140453	7.40933e-05	0.000229867	0	0	0.000125727	0.000131851	0.00012372	0.000175029	0	0	0.000125402		0	0	0.00012698	0.000140721	0	0.000196673	0.000174557	0.000276836	0	0	0	0	0.000118025	0.000239187	0	0.000231972	0	0.000170195	0	0.000160999	0.000368972	5.61577e-05	0.000251974	0.000249667	0	0.000189436	0.000139285
RAB30	-47.05	0.999709	0	0.456349	0	0	0	0.000103857	5.76286e-05	0	0.000185233	0.000229867	0	0	3.14317e-05	0.000263701	0.00012372	0.000116686	0.000116225	0.000308896	0.000125402		0	3.27279e-05	0.00019047	3.51803e-05	2.89998e-05	0	6.98227e-05	6.92089e-05	0.000128601	3.38513e-05	7.12936e-05	0.0003517	5.90127e-05	0.000239187	6.72269e-05	0	3.16486e-05	0.000238274	0	0	0	2.80788e-05	0	2.77408e-05	7.25558e-05	0	0
C5orf30	-48.9	0.999709	0	0.748676	0	0.000207993	0	6.92377e-05	0.000259329	0	0.00011114	0.000191556	2.80332e-05	0	0.000282885	0.000175801	0.00018558	0	0.000145281	6.86436e-05	0.000209004		0	3.27279e-05	0.000158725	0	0	0	0	0	0	3.38513e-05	3.56468e-05	0.000117233	0	0	0.000134454	9.94168e-05	0.000189891	0	0	0.000160999	2.83825e-05	0.000140394	0.000167983	0.000110963	0.000290223	3.15726e-05	0.000174107
MIER3	-92.75	0.999709	0	0.998284	0.000136814	2.97133e-05	0.000135026	0.000242332	0.0002017	2.80907e-05	0	3.83112e-05	0	0.000160746	0.000125727	4.39502e-05	0.00018558	2.91715e-05	0.000203394	0	0.000125402		0.000131247	0	0.000158725	0.000140721	8.69994e-05	0	3.49113e-05	0	3.21502e-05	0.000101554	0.00010694	0	2.95064e-05	0	0.00010084	0	0.000126594	0	3.54912e-05	0	0.000170295	0	0.000111988	0	0.000108834	0.000157863	0
PRAM1	-61.3	0.999709	0	0.292763	0.000164177	0	0.000108021	0.000138475	0.0002017	0.000337088	0	0.000191556	0.000168199	0	0.00018859	0	6.18601e-05	0	0.000145281	6.86436e-05	0		0	0.000130911	0.00012698	0.000281442	2.89998e-05	0.000449539	3.49113e-05	0	3.21502e-05	0	3.56468e-05	0.000156311	2.95064e-05	0.000159458	0.000134454	0	0	0.000136156	0.000319421	3.21999e-05	0	2.80788e-05	0	0.000110963	7.25558e-05	9.47179e-05	0
RPAP1	-124.4	0.999709	0	0.837327	8.20883e-05	0.000267419	0.000162031	0.000103857	0.000345772	0	0	0.000191556	2.80332e-05	0.000128597	0.000125727	0	6.18601e-05	8.75146e-05	0.000116225	0.000171609	0.000167203		3.28116e-05	0	0	0.000246262	2.89998e-05	8.42886e-05	0.000139645	3.46045e-05	3.21502e-05	0	0.000142587	0.000156311	0	0	0	9.94168e-05	9.49457e-05	0.000170195	3.54912e-05	9.65997e-05	0.00022706	0.00025271	0.000139985	0.000166445	0	0.000157863	3.48214e-05
CIITA	-81.95	0.999709	0	0.0161498	0.000300991	0.000237706	0.000162031	0.000380807	0.000345772	0.000308997	7.40933e-05	0	0.000308365	6.42983e-05	0.000282885	0	0.000247441	0.000320887	2.90563e-05	0	0		3.28116e-05	3.27279e-05	0.00012698	0.000140721	0.000202999	0.000196673	0	6.92089e-05	0.000128601	0	7.12936e-05	0	0	0.000119593	3.36134e-05	3.31389e-05	0	0.000306352	0.000532368	3.21999e-05	0.000170295	0.000196552	0	0.000110963	7.25558e-05	0.000252581	0
EDA	-69.25	0.999709	0	0.278829	2.73628e-05	0.000148566	0	0.000207713	0	0.000140453	0	0.000114934	0.000112133	0.000128597	0.000282885	0.000175801	0.000247441	0	0	0.000137287	4.18008e-05		0	9.81836e-05	0	0	0.000144999	0	3.49113e-05	0.000138418	0	0	0.00010694	0.000468933	0	0	0.000134454	0.000331389	0.000158243	0	0	0	0.000141912	5.61577e-05	5.59942e-05	0	0	0	0.000348214
LRRC37A3	-101.65	0.999709	0	0.752213	0	0.00017828	0.000216041	0.00031157	0	0.000224725	0.00011114	0.000153245	0.000168199	0	0.000345749	0	9.27902e-05	8.75146e-05	0.000174338	0.000240253	0.000167203		0.000131247	0	6.349e-05	3.51803e-05	0.000115999	0	0	6.92089e-05	3.21502e-05	0.000203108	0	0.000273544	0.000118025	0.000159458	3.36134e-05	0.000198834	0.00022154	6.80782e-05	0.000106474	0.000225399	0.000397355	0.000168473	2.79971e-05	0	0.000326501	0	0.000278571
ADAMTS6	-69.95	0.999709	0	5.83371e-12	0	5.94265e-05	0	0.000138475	0.0002017	8.4272e-05	0	0.000191556	0.000168199	0.000868028	0.000345749	0	0.00018558	0.000291715	0.000116225	3.43218e-05	0		0	9.81836e-05	0	0.000633245	0.000115999	0	0	0	0	0	0	0.000117233	0	0.00143512	0	6.62778e-05	0	0.000272313	3.54912e-05	0	2.83825e-05	0.000196552	0.000167983	8.32224e-05	0.000108834	3.15726e-05	0
EID3	-63.05	0.999709	0	0.323511	0.000109451	0.000237706	0	0	0.000115257	0	0	0.000153245	0.000252299	0.000128597	0	4.39502e-05	9.27902e-05	0.000204201	0	0	0.000459809		0	0	0.00025396	0	0	0	0.000139645	0	0.000257202	0	0	3.90778e-05	0	0	0	0.000132556	9.49457e-05	0.000306352	0.000212947	9.65997e-05	0.00011353	0.000140394	0	2.77408e-05	0.000145112	0	0.00024375
MTFR2	-23.85	0.999709	0	0.125048	0.000164177	0.000118853	0.000135026	0.000207713	0.000115257	2.80907e-05	0	0	0.000224266	9.64475e-05	0	0	0	0.000175029	0.000116225	6.86436e-05	0.000334406		0	0	0.000285705	0	2.89998e-05	0	0.000139645	0.000380649	0	6.77025e-05	0	0.000156311	2.95064e-05	3.98645e-05	0.00010084	0	0.000158243	0.000442508	0.000212947	3.21999e-05	0	0.000112315	0	2.77408e-05	0	0.000221008	0.000104464
CD1D	-50.7	0.999709	0	0.602019	0.000164177	0.00017828	0	0	0.000115257	0	0	0.000153245	0.000112133	3.21492e-05	3.14317e-05	0	0.00012372	0.000145858	0.000174338	0.000102965	0		0	0.000130911	0	0	0	5.61924e-05	0	0	0	0.000169256	0.000320821	0.000195389	0	0	0	0	3.16486e-05	0	7.09824e-05	0	8.51474e-05	0	0	0.000110963	0	3.15726e-05	0
KLHL32	-89.8	0.999709	0	0.204196	8.20883e-05	0	5.40103e-05	0	0.0002017	0.000140453	0	0	0.000168199	0.000417939	0.000125727	0.000175801	9.27902e-05	0.000262544	0	0.000343218	0.000459809		0	3.27279e-05	0	3.51803e-05	0	0	3.49113e-05	0	6.43004e-05	0	0	0.000312622	2.95064e-05	7.97289e-05	0	0	0.000126594	0	0.000212947	0.000289799	8.51474e-05	0.000308867	0.000111988	0	0.000108834	3.15726e-05	0.000557142
BBS10	-60.05	0.999709	0	0.819274	0	0.000267419	0	3.46188e-05	0	0	0	0.000114934	0.000252299	0.000225044	9.42951e-05	0.000131851	0.000247441	0.000116686	0.000116225	0	0.000125402		3.28116e-05	0.000196367	0.000158725	3.51803e-05	2.89998e-05	5.61924e-05	0.000104734	0	0	3.38513e-05	0	0	0	0	0	0	0.000284837	0.000136156	0	0.000193199	2.83825e-05	0	0	0.000110963	0.000253945	9.47179e-05	0.000174107
KANSL1	-134.25	0.999709	0	0.414774	0.000355716	5.94265e-05	0.000243046	0	2.88143e-05	0	0	0.000191556	0.000168199	0.000192895	0.000125727	0.000263701	0.000247441	0.000320887	0.00023245	3.43218e-05	0.000376207		3.28116e-05	3.27279e-05	9.52351e-05	0	0	2.80962e-05	0.000384025	0.000173022	0	6.77025e-05	0.000142587	7.81555e-05	2.95064e-05	0	0	0	3.16486e-05	0.000204234	0.000141965	0	2.83825e-05	5.61577e-05	0	0.000110963	0	9.47179e-05	6.96427e-05
SLC30A5	-69.8	0.999709	0	0.0652109	0.000109451	0.000118853	0	0.000173094	0.000172886	5.61814e-05	0	0.000153245	5.60664e-05	9.64475e-05	3.14317e-05	0.000175801	0.00012372	0	0.000145281	0.000686436	0		0	0.000360007	3.1745e-05	0	2.89998e-05	0	0	0	3.21502e-05	0	0.000213881	0	0	0.000119593	0.000470588	0.000132556	9.49457e-05	0.000170195	3.54912e-05	0.000225399	0	0.000196552	5.59942e-05	0.000277408	0	0.000252581	0.000208928
C19orf44	-135.15	0.999709	0	0.116399	0	0.000118853	2.70051e-05	0.000138475	0.000115257	8.4272e-05	0.000296373	0.000268179	2.80332e-05	3.21492e-05	0.000220022	4.39502e-05	0.000402091	0.00037923	2.90563e-05	0.000171609	0.000209004		0.000295305	0	0	0	2.89998e-05	0	0	0	3.21502e-05	0	0	0	0	0.000199322	0.000605042	0.000198834	0.000126594	0.000102117	0	3.21999e-05	0	0.000280788	0	0.000138704	0	0	0.000208928
LRRC70	-178.4	0.999709	0	0.209469	0	0.000207993	5.40103e-05	3.46188e-05	0.000115257	0.000337088	0.000185233	0.000114934	0.000168199	0.000417939	3.14317e-05	0	0.000804182	8.75146e-05	8.71688e-05	0.000171609	8.36016e-05		0	3.27279e-05	0.00012698	0	2.89998e-05	0	0	0	3.21502e-05	0	0	0	0	3.98645e-05	0.00010084	0	0	0.000102117	0	0.0001288	0.000170295	0.000112315	0.000167983	2.77408e-05	0	0.000252581	3.48214e-05
BIN1	-70	0.999709	0	0.566906	0.000109451	0.00017828	0.000162031	3.46188e-05	0	0.000112363	0.00011114	0	0.000224266	0	0.000157159	0	0	0.000116686	0	0.000240253	8.36016e-05		6.56233e-05	0.000130911	0	0.000175901	0	0	0	0.000103813	0.000128601	6.77025e-05	3.56468e-05	0.000390778	0	3.98645e-05	0	0.000231972	0	0.000102117	0	9.65997e-05	8.51474e-05	0.000112315	0	0.000138704	0	6.31453e-05	0.000417856
PLEKHG5	-52.8	0.999709	0	0.562383	0.000109451	0.000118853	0.000243046	0	0.000144071	0	0.000148187	0.000153245	0	0	0	8.79005e-05	0.00015465	0.000291715	0.000116225	0	0		0	0	0.000158725	0	0.000173999	0	0.000174557	6.92089e-05	0.000257202	0	0	0	2.95064e-05	0	0.000268908	6.62778e-05	6.32971e-05	0	0.000248438	0	0	8.42365e-05	2.79971e-05	8.32224e-05	0	6.31453e-05	0.000174107
SOCS5	-59.05	0.999709	0	0.536163	0	0	0.000162031	0.000346188	0.000115257	0	0	0.000114934	0	0	0	0.000131851	0.00018558	0.000204201	0.000145281	0.000274574	0		0	3.27279e-05	3.1745e-05	0	0.000202999	0.00022477	0	0.000242231	0	0	0.000392115	0.000117233	0	0	0	6.62778e-05	0	0.000170195	0.000106474	9.65997e-05	0.00022706	0	0	8.32224e-05	0.000145112	6.31453e-05	6.96427e-05
TEX2	-74.75	0.999709	0	0.170492	0.000164177	0	0.000216041	0.000138475	0.000230514	0.000112363	3.70466e-05	0	0.000224266	0	0.000157159	4.39502e-05	0.000278371	0.000175029	0	0.000274574	4.18008e-05		3.28116e-05	6.54557e-05	0	7.03606e-05	0	0	0	0.000138418	0	0.000406215	0.000142587	0	0	0	0.000504202	0.000132556	0.000158243	0.000170195	0	0	0.000283825	0.000224631	0	0	0.000181389	9.47179e-05	0
TCF7	-114.8	0.999709	0	0.0179537	0	0.000118853	0.000189036	0.000173094	0.000547472	0.000112363	3.70466e-05	0.000114934	8.40996e-05	3.21492e-05	0.000345749	0	3.09301e-05	0	0.000552069	0.000205931	8.36016e-05		0	0.000163639	0	0	8.69994e-05	0	0.000174557	0	6.43004e-05	0	3.56468e-05	0.000429855	0	0	6.72269e-05	0.000132556	0.000284837	0.000170195	0	0	8.51474e-05	8.42365e-05	0	0.000221926	0.000399057	9.47179e-05	0
KIAA1468	-120.3	0.999709	0	0.0438506	0	0.000207993	0.000324062	0.000207713	0	0	7.40933e-05	0	0.000420498	0	0.000534339	0.000395552	0.00012372	0.000145858	0.000174338	0.000102965	0		0.000229681	0.000229095	0	3.51803e-05	2.89998e-05	0.000112385	0	0	3.21502e-05	6.77025e-05	0	0	2.95064e-05	7.97289e-05	3.36134e-05	0.000165695	0.00066462	0.000102117	7.09824e-05	0.000193199	0.000141912	5.61577e-05	0.000111988	8.32224e-05	0.000108834	3.15726e-05	0
DIRAS3	-154.7	0.999709	0	0.000221457	2.73628e-05	0.000118853	0	6.92377e-05	0.000432214	0.000505632	7.40933e-05	0.000268179	0.000112133	6.42983e-05	0.000125727	0.000131851	0.000835112	0.000116686	0	0.000652114	4.18008e-05		0.000131247	0	6.349e-05	0	0	0	6.98227e-05	0	0	0	0.000142587	0	5.90127e-05	0.00035878	0.000369748	0	3.16486e-05	3.40391e-05	3.54912e-05	0.0001288	2.83825e-05	2.80788e-05	0	0	3.62779e-05	0.000126291	0
ELN	-62.3	0.999709	0	6.56435e-06	2.73628e-05	0	2.70051e-05	0	8.64429e-05	0.000112363	0.00022228	0.000153245	0.000224266	0	0.000942951	0.000571353	0.00015465	0.000116686	0	0.000240253	0.000125402		0.000164058	0	0	0.000281442	0	0	0	0.00031144	0	0	0	0.000625244	0	7.97289e-05	0.000235294	0	3.16486e-05	0.00037443	0	9.65997e-05	0	0.000168473	0	2.77408e-05	0	0.000221008	0.000174107
PARPBP	-127.8	0.999709	0	0.377448	0.000136814	5.94265e-05	0.000135026	0.000138475	0.000172886	0.000168544	0	7.66225e-05	0.000280332	0.000225044	0.000125727	0.000131851	0	0.000233372	5.81125e-05	0.000137287	0		0	0	0	0.000140721	0	2.80962e-05	0.000104734	0.000346045	0.000225051	6.77025e-05	0	0.000195389	0.000118025	3.98645e-05	3.36134e-05	0	0.00022154	0.000102117	0	0	0	0.000168473	0	8.32224e-05	3.62779e-05	0.000221008	0.000208928
MXD4	-71.35	0.999709	0	0.642688	0	0.00017828	2.70051e-05	0.00031157	0	5.61814e-05	0.000185233	0.000191556	0	0	0.000282885	0.000351602	0.00015465	0.000262544	0	0.000308896	0		3.28116e-05	9.81836e-05	0.00025396	3.51803e-05	2.89998e-05	2.80962e-05	0	0.000103813	0	0	3.56468e-05	0	0.000177038	0.000159458	0	0	0.000126594	3.40391e-05	0.000248438	0	0	0.000168473	0.000111988	8.32224e-05	0.000217667	3.15726e-05	0.000139285
ULBP3	-150.8	0.999709	0	0.250891	0	2.97133e-05	2.70051e-05	3.46188e-05	0.000115257	0.000337088	0	0	0.000168199	0.000225044	0.000220022	0.000351602	0.000340231	0.000116686	0.000203394	0.00037754	0.000125402		0.000131247	6.54557e-05	3.1745e-05	0	0	0	0	0	9.64506e-05	0	0.00010694	0	0	0.000398645	0.000302521	0.000165695	3.16486e-05	0	0	0	0	8.42365e-05	0	0	3.62779e-05	6.31453e-05	0.000208928
PZP	-126.85	0.999709	0	0.333074	5.47256e-05	0	0.000135026	0.000103857	0.0002017	0	0	0.000191556	0.000140166	0.000128597	9.42951e-05	0.000175801	0.00015465	0.000116686	0	0.000171609	4.18008e-05		0	6.54557e-05	3.1745e-05	0	0	0	0.000314202	6.92089e-05	0	0	0	0.000508011	0	0	0.000268908	0	0.000126594	0	0	6.43998e-05	2.83825e-05	0.000196552	2.79971e-05	0.000138704	0.000108834	0	0.000208928
KIAA0226L	-49.9	0.999709	0	4.58166e-05	0.000164177	0.000207993	0.000135026	0	0.0002017	0.000140453	0	0	0.000224266	3.21492e-05	0	0.000131851	3.09301e-05	0.000145858	0.000493956	0	0.000167203		3.28116e-05	3.27279e-05	0.00031745	0	0.000173999	0.000702405	0	0.000173022	0.000578704	0	7.12936e-05	0.000234467	0.000590127	7.97289e-05	0	0	0	3.40391e-05	0	0	5.6765e-05	0	0.000111988	0	0.000326501	3.15726e-05	0
AGAP3	-134.8	0.999709	0	0.126608	0.000246265	0	0.000432082	0.00058852	0.000115257	2.80907e-05	0.00022228	0	0	0	0.000125727	8.79005e-05	0.00021651	0	0.000174338	0.000205931	0.000125402		0	3.27279e-05	9.52351e-05	7.03606e-05	0	0	0	0	0	0	0	0.000117233	2.95064e-05	0.000119593	0.00010084	0	0	0	0.000106474	0	0.00011353	0	2.79971e-05	0	0.000217667	0.000284154	6.96427e-05
FAM64A	-114.2	0.999709	0	0.572199	0.000164177	2.97133e-05	0.000270051	0.000242332	0	5.61814e-05	3.70466e-05	0.000153245	0.000196232	9.64475e-05	0.000125727	0.000175801	0.00015465	0.000175029	0	0	8.36016e-05		0.000131247	3.27279e-05	0	0	5.79996e-05	8.42886e-05	0.000418936	0.00031144	0.000257202	0	0	0	2.95064e-05	0	0	0.000132556	0	0.000170195	0	0	0.00022706	0.000168473	0	0	0	0	0.000104464
TMIGD2	-135.95	0.999709	0	2.19721e-06	8.20883e-05	0.000772545	8.10154e-05	0.000173094	0.000288143	0.000252816	0	0.000229867	5.60664e-05	0	0.000377181	4.39502e-05	0.00012372	0.000291715	0.000174338	0.000137287	0.000209004		3.28116e-05	3.27279e-05	0.00019047	0.000211082	5.79996e-05	2.80962e-05	0	0	0.000289352	3.38513e-05	0.00124764	0.000117233	0	0	0	0.000132556	0	0	0.000141965	0.0001288	0	0.000168473	0	0.000194186	3.62779e-05	0	0.000139285
LRRC45	-149.5	0.999709	0	0.58164	0.000191539	0.000267419	8.10154e-05	0.000242332	0.000144071	0	7.40933e-05	0.000153245	0.000112133	0.000192895	0.000314317	0.000351602	0	0.000262544	2.90563e-05	0.000240253	0		0	0	0	0	0	0	0.000104734	0	0.000192901	0.000135405	0.000178234	0.000234467	0.000236051	0.000159458	3.36134e-05	9.94168e-05	0.000253189	0	0.000177456	0.000160999	0.000198677	5.61577e-05	0	0	0.000108834	3.15726e-05	0.000208928
ATPAF1	-165.2	0.999709	0	0.0301099	0.000136814	0.000207993	0.000567108	6.92377e-05	0.000259329	0.000196635	0	0.000114934	0.000140166	0.000225044	0	0.000307652	9.27902e-05	0.000612602	0	0	0.000167203		0	6.54557e-05	0.00012698	0	0.000115999	0	0.000104734	0	6.43004e-05	0	0.000356468	0	8.85191e-05	0.000159458	0.000235294	0	0	3.40391e-05	0.000461386	0	0	2.80788e-05	0	0.000305149	0.000108834	3.15726e-05	0.000174107
SIAH3	-140.05	0.999709	0	0.000536199	0	0.000237706	0	0.000242332	0.000115257	0.000140453	0.000148187	0	0.000252299	0.000192895	0.000565771	0.000307652	0.000649531	0.000116686	0	0.000274574	0.000794215		0	0	0	0	0.000231998	0	0	0	0	0	0	3.90778e-05	0.000206545	0.00035878	0.000537815	0.00029825	0.000126594	0	0	0	5.6765e-05	0.000533498	0	2.77408e-05	0.000544168	0.000284154	0
CXCL13	-101.55	0.999709	0	1.64752e-08	0.000273628	0.000505126	0	0.000450045	0.000489843	0.000365179	0.000592746	0	0.000112133	0	6.28634e-05	0	0	0.000233372	0.00122036	0.000171609	0		0	0	0.000158725	0.000527704	0.000521996	0	6.98227e-05	0	0.00102881	0	0.000570349	0	2.95064e-05	0	0.000201681	0.000132556	0	0	0.000141965	6.43998e-05	2.83825e-05	2.80788e-05	0	0.000194186	0.000290223	3.15726e-05	0.000139285
[truncated: 25 more columns]
